# Supplementary material for: Moving Forward: Understanding Correlates of Physical Activity and Sedentary Behaviour during COVID-19—An Integrative Review and Socioecological Approach
Source: MDPI journal article supplement (doi:10.3390/ijerph182010910), 2021-10-17
Supplement: s1 [file s1]

**Supplementary File S1.** Further details of literature review stage methodology.

|                                                   |                                                                                                                                                                                                                                                                                                                                                                                                                                                                                                                                                                                                                                                                                                                                                                                                                                                                                                                                                                                                                                                                                                                                                           |
|---------------------------------------------------|-----------------------------------------------------------------------------------------------------------------------------------------------------------------------------------------------------------------------------------------------------------------------------------------------------------------------------------------------------------------------------------------------------------------------------------------------------------------------------------------------------------------------------------------------------------------------------------------------------------------------------------------------------------------------------------------------------------------------------------------------------------------------------------------------------------------------------------------------------------------------------------------------------------------------------------------------------------------------------------------------------------------------------------------------------------------------------------------------------------------------------------------------------------|
| <b>Example of search strategy for SportDiscus</b> | <p>TI "coronavirus" OR AB "coronavirus" OR TI "COVID-19" OR AB "COVID-19" OR TI "COVID 19" OR AB "COVID 19" OR TI "SARSCoV2" OR AB "SARSCoV2" OR TI "SARS-CoV-2" OR AB "SARS-CoV-2" OR TI "SARS CoV 2" OR AB "SARS CoV 2" OR TI "novel coronavirus" OR AB "novel coronavirus" OR TI "COVID" OR AB "COVID" OR TI "n-CoV" OR AB "n-CoV"</p> <p align="center">AND</p> <p>TI "physical activ*" OR AB "physical activ*" OR TI "exercise" OR AB "exercise" OR TI "physical function" OR AB "physical function" OR TI "physical performance" OR AB "physical performance" OR TI "sport" OR AB "sport" OR TI "recreation" OR AB "recreation" OR TI "active travel" OR AB "active travel" OR TI "sedentary time" OR AB "sedentary time" OR TI "sedentary lifestyle*" OR AB "sedentary lifestyle*" OR TI "sedentary behavi*" OR AB "sedentary behavi*" OR TI "physical inactiv*" OR AB "physical inactiv*" OR TI "prolonged sitting" OR AB "prolonged sitting"</p> <p>Terms were developed following Librarian guidance and extensive testing. The terms "sitting" and "screen time" were found to be incorporated within broader sedentary behavior/time term</p> |
| <b>Study Selection Process</b>                    | <p>Following the removal of duplicates, two authors (RLK and AWR) independently reviewed all generated citations and abstracts to select eligible studies using Rayyan (QRCI, Qatar), coding articles "Included" or "Excluded". Discrepancies were resolved through discussion. All articles subsequently coded "Included" were obtained as full-text articles and reviewed against the pre-defined inclusion/exclusion criteria independently by the two authors. Disagreements regarding eligibility were resolved by discussion with a third reviewer where necessary. Full text articles retrieved were hand searched via reference checking.</p>                                                                                                                                                                                                                                                                                                                                                                                                                                                                                                     |
| <b>Quality Assessment</b>                         | <p>One reviewer (RLK) independently assessed study quality using the Mixed Methods Assessment Tool, a second reviewer (AWR) independently assessed 25% of the studies to ensure consistency. Disagreements between the two reviewers were resolved through discussion. No studies were excluded due to low quality, rather all issues were considered when interpreting the results of each study.</p>                                                                                                                                                                                                                                                                                                                                                                                                                                                                                                                                                                                                                                                                                                                                                    |
| <b>Data extraction</b>                            | <p>A standardised form based on the Cochrane Collaboration example was piloted and used to extract data from the included studies for evidence synthesis. Extracted information included: authors; year of publication; study design, setting, and population (including sample size, participant demographics and characteristics); study methodology, recruitment and completion rates (where applicable); inclusion/exclusion criteria; context of the pandemic (including stage, mitigation and confinement strategies in place at the time of the study), and, correlates of physical activity and sedentary behavior in relation to the COVID-19 pandemic. A second reviewer (AWR) independently reviewed 25% of the extracted data, discrepancies identified were resolved through discussion with a third reviewer (LS) where necessary. Supplementary data was consulted where available and necessary.</p>                                                                                                                                                                                                                                      |

Table S1. Study characteristics.

| Authors/<br>Year                 | Title                                                                                                              | Country | Study Design                                               | COVID-19<br>Restrictions           | Inclusion/Exclusion<br>Criteria | Aim                                                                                                                                                                                        | Participants                                                              | Pertinent<br>Participant<br>Demographics                                                                                                                         | Relevant<br>Outcomes                                                | Outcome<br>Measurement<br>Tools                                 | Overall<br>MMAT<br>Grade |
|----------------------------------|--------------------------------------------------------------------------------------------------------------------|---------|------------------------------------------------------------|------------------------------------|---------------------------------|--------------------------------------------------------------------------------------------------------------------------------------------------------------------------------------------|---------------------------------------------------------------------------|------------------------------------------------------------------------------------------------------------------------------------------------------------------|---------------------------------------------------------------------|-----------------------------------------------------------------|--------------------------|
| Acs et<br>al.<br>(2020)<br>[18]  | Effects of Covid-19 on Physical Activity Behaviour Among University Students: Results of A Hungarian Online Survey | Hungary | Cross-sectional, study via self-administered online survey | Home confinement                   | Student at University of Pecs   | To examine and compare PA patterns among young adults before and during COVID-19 restrictions with respect to self-rated mental health and physical health during home confinement periods | $n = 827$<br>Mean age = 25.29 years ( $\sigma$ 8.09)                      | 78.4% female<br>82.22% lived in urban environment<br>42.32% married or cohabiting<br>11.73% had children<br>37.6% did not participate in any sports pre-COVID-19 | PA<br><br>Sitting time<br><br>Self-rated physical and mental health | IPAQ-SF<br><br><br>5-point Likert scale (1 = worst to 5 = best) | ****                     |
| Alomari et al.<br>(2020)<br>[19] | Changes in Physical Activity and Sedentary Behavior Amid Confinement: The BKSQ-COVID-19 Project                    | Jordan  | Cross-sectional, study via self-administered online survey | Home confinement/social distancing | Aged >18 years                  | To investigate changes in PA and SB during COVID-19                                                                                                                                        | $n = 1844$<br>Mean age = 33.7 years ( $\sigma$ 11.3)<br>Range 18–72 years | 69.5% female;<br>43.3% normal weight<br>34.5% low income<br>65.5% middle, 35.6% unemployed or retired<br>64.4 employed                                           | PA<br><br>Screen time                                               | Individually constructed questionnaire (Unvalidated)            | ***                      |

Table S1. Study characteristics continued.

| Authors/<br>Year                    | Title                                                                                                                                                        | Country | Study Design                                                                                        | COVID-19<br>Restrictions                                                                                      | Inclusion/Exclusion<br>Criteria                                                                               | Aim                                                                                                                                                                                                                                                                                                                                                                                                                                | Participants                                                                        | Pertinent<br>Participant<br>Demographics                                                                                                                                  | Relevant<br>Outcomes                                          | Outcome<br>Measurement<br>Tools                                                                                                                  | Overall<br>MMAT<br>Grade |
|-------------------------------------|--------------------------------------------------------------------------------------------------------------------------------------------------------------|---------|-----------------------------------------------------------------------------------------------------|---------------------------------------------------------------------------------------------------------------|---------------------------------------------------------------------------------------------------------------|------------------------------------------------------------------------------------------------------------------------------------------------------------------------------------------------------------------------------------------------------------------------------------------------------------------------------------------------------------------------------------------------------------------------------------|-------------------------------------------------------------------------------------|---------------------------------------------------------------------------------------------------------------------------------------------------------------------------|---------------------------------------------------------------|--------------------------------------------------------------------------------------------------------------------------------------------------|--------------------------|
| Angosto<br>et al.<br>(2020)<br>[20] | Motives and<br>Commitment to<br>Sport in<br>Amateurs during<br>Confinement: A<br>Segmentation<br>Study                                                       | Spain   | Cross-<br>sectional,<br>Study via self-<br>administered<br>online survey                            | Stay-at-home<br>order period<br>into period of<br>established<br>time zones for<br>outdoor PA<br>based on age | Amateur sports<br>persons over 18 years<br>and resident in area of<br>study                                   | To assess the motives and<br>commitment of the<br>population to physical<br>activity during the phase<br>of confinement and<br>return to the “new<br>normality”, identifying<br>the latent factors in the<br>motives and<br>commitment. To compare<br>the socio-demographic<br>and motivational profiles<br>according to the level of<br>commitment to physical<br>activity of the practitioner<br>during the COVID-19<br>pandemic | $n = 1025$<br>Mean age =<br>35.3 years<br>( $\sigma$ 14.2)<br>Range 18–<br>70 years | 47.9% female;<br>72.7% at least<br>graduate level<br>educated<br>44% married or<br>cohabiting<br>54.3%<br>employed;<br>39.9% student;<br>5.7%<br>unemployed or<br>retired | Motives<br>for PA                                             | Individually<br>constructed<br>questionnaire<br>(Validated)                                                                                      | ****                     |
| Asiamah<br>et al.<br>(2021)<br>[21] | Short-Term<br>Changes in<br>Behaviours<br>Resulting from<br>COVID-19-<br>Related Social<br>Isolation and<br>Their Influences<br>on Mental Health<br>in Ghana | Ghana   | Cross-<br>sectional, study<br>via self-<br>administered<br>online survey<br>(convenience<br>sample) | Mandatory<br>stay-at-home<br>order                                                                            | General population of<br>3 cities, aged 18+<br>years, speak English,<br>socially isolated due<br>to lockdown. | To assess if changes in<br>behaviours due to<br>COVID-19 social<br>distancing measures have<br>a significant influence on<br>mental health                                                                                                                                                                                                                                                                                         | $n = 643$<br>Mean age =<br>36 years<br>Range 18–<br>64 years                        | 35% female<br>94% had<br>tertiary<br>education                                                                                                                            | PA<br>Exercising<br>Sedentary<br>time<br><br>Mental<br>Health | Individually<br>constructed<br>questionnaire<br>(Validated)<br><br>9-item Likert<br>scale (1 =<br>strongly<br>disagree to 5 =<br>strongly agree) | ***                      |

**Table S1.** Study characteristics continued.

| Authors/<br>Year                | Title                                                                                                                        | Country                 | Study Design                                                                   | COVID-19<br>Restrictions            | Inclusion/Exclusion<br>Criteria                                                                                    | Aim                                                                                                                                                                                                                  | Participants                                                            | Pertinent<br>Participant<br>Demographics                                                                  | Relevant<br>Outcomes | Outcome<br>Measurement<br>Tools | Overall<br>MMAT<br>Grade |
|---------------------------------|------------------------------------------------------------------------------------------------------------------------------|-------------------------|--------------------------------------------------------------------------------|-------------------------------------|--------------------------------------------------------------------------------------------------------------------|----------------------------------------------------------------------------------------------------------------------------------------------------------------------------------------------------------------------|-------------------------------------------------------------------------|-----------------------------------------------------------------------------------------------------------|----------------------|---------------------------------|--------------------------|
| Barwais<br>(2020)<br>[22]       | Physical activity at home during the covid-19 pandemic in the two most affected cities in Saudi Arabia                       | Kingdom of Saudi Arabia | Cross-sectional, study via self-administered online survey                     | 24-hour curfew (stay-at home order) | Live in Mecca or Medina General population                                                                         | To explore the amount of time people spend engaged in daily physical activity at home during the lockdown by examining differences in adults' levels of PA before and during the pandemic                            | $n = 244$<br>Mean age = 33.8 years ( $\sigma$ 7.7)<br>Range 18–50 years | 36.9% female<br>Overall, 903 $\pm$ 755.6 MET-mins/week pre-COVID-19                                       | PA                   | IPAQ-SF                         | ***                      |
| Belgen et al.<br>(2020)<br>[23] | Determination of exercise habits, physical activity level and anxiety level of postmenopausal women during COVID-19 pandemic | Northern Cyprus         | Cross-sectional, study via self-administered online survey (purposeful sample) | Self-quarantine/stay-at-home order  | Postmenopausal women aged 50–75 years, with postmenopausal period of at least 1 year. Self-quarantined for 1 month | To investigate the exercise habits before and during the pandemic, PA levels and anxiety levels during the pandemic of postmenopausal women who were self-quarantined and did not go out of their houses for a month | $n = 104$<br>Mean age = 59 years ( $\sigma$ 6.62)                       | 100% female<br>91.3% lived with at least 1 other person<br>52% doing regular exercise before the pandemic | Anxiety              | Beck Anxiety Inventory          | ****                     |

Table S1. Study characteristics continued.

| Authors/<br>Year               | Title                                                                                                                                                                                             | Country | Study Design                                                                                       | COVID-19<br>Restrictions                              | Inclusion/Exclusion<br>Criteria                                                 | Aim                                                                                                                                                                                                                                                    | Participants                                                | Pertinent<br>Participant<br>Demographics                                | Relevant<br>Outcomes         | Outcome<br>Measurement Tools                                                                                              | Overall<br>MMAT<br>Grade |
|--------------------------------|---------------------------------------------------------------------------------------------------------------------------------------------------------------------------------------------------|---------|----------------------------------------------------------------------------------------------------|-------------------------------------------------------|---------------------------------------------------------------------------------|--------------------------------------------------------------------------------------------------------------------------------------------------------------------------------------------------------------------------------------------------------|-------------------------------------------------------------|-------------------------------------------------------------------------|------------------------------|---------------------------------------------------------------------------------------------------------------------------|--------------------------|
| Brady et<br>al. (2020)<br>[24] | Different types of<br>physical activity<br>are positively<br>associated with<br>indicators of<br>mental health and<br>psychological<br>wellbeing in<br>rheumatoid<br>arthritis during<br>COVID-19 | UK      | Cross-<br>sectional,<br>study via self-<br>administered<br>online survey<br>(purposeful<br>sample) | Stay-at-<br>home, once a<br>day exercise<br>permitted | Self-report clinical<br>diagnosis of<br>rheumatoid arthritis.<br>Aged 18+ years | The aims of this<br>study were to<br>explore the<br>associations<br>between PA and<br>ST with<br>indicators of<br>mental health and<br>well-being in RA<br>during COVID-19<br>and examine the<br>impact of self-<br>isolation on these<br>associations | $n = 345$<br>Mean age =<br>51.48 years<br>( $\sigma$ 11.73) | 93% female;<br>96.8% white;<br>RA duration<br>$10.52 \pm 9.87$<br>years | PA                           | National Institutes<br>of Health- American<br>Association of<br>Retired Persons Diet<br>and Health Study<br>questionnaire | ***                      |
|                                |                                                                                                                                                                                                   |         |                                                                                                    |                                                       |                                                                                 |                                                                                                                                                                                                                                                        |                                                             |                                                                         | Sitting time                 | IPAQ-SF                                                                                                                   |                          |
|                                |                                                                                                                                                                                                   |         |                                                                                                    |                                                       |                                                                                 |                                                                                                                                                                                                                                                        |                                                             |                                                                         | Pain                         | McGill Pain<br>Questionnaire                                                                                              |                          |
|                                |                                                                                                                                                                                                   |         |                                                                                                    |                                                       |                                                                                 |                                                                                                                                                                                                                                                        |                                                             |                                                                         |                              | Visual analogue<br>scale- 0 (no pain) to<br>10 (worst<br>imaginable)                                                      |                          |
|                                |                                                                                                                                                                                                   |         |                                                                                                    |                                                       |                                                                                 |                                                                                                                                                                                                                                                        |                                                             |                                                                         |                              | Fatigue                                                                                                                   |                          |
|                                |                                                                                                                                                                                                   |         |                                                                                                    |                                                       |                                                                                 |                                                                                                                                                                                                                                                        |                                                             |                                                                         |                              | Multidimensional<br>Fatigue Inventory                                                                                     |                          |
|                                |                                                                                                                                                                                                   |         |                                                                                                    |                                                       |                                                                                 |                                                                                                                                                                                                                                                        |                                                             |                                                                         | Anxiety<br>and<br>Depression | HADS                                                                                                                      |                          |
|                                |                                                                                                                                                                                                   |         |                                                                                                    |                                                       |                                                                                 |                                                                                                                                                                                                                                                        |                                                             |                                                                         | Subjective<br>Vitality       | Subjective Vitality<br>Scale                                                                                              |                          |

**Table S1.** Study characteristics continued.

| Authors/<br>Year                      | Title                                                                                                                                              | Country | Study Design                                                             | COVID-19<br>Restrictions | Inclusion/Exclusion<br>Criteria           | Aim                                                                                                                                                                                                                                                                                                                                             | Participants                                                                            | Pertinent<br>Participant<br>Demographics                                                                                                                                      | Relevant<br>Outcomes                                                        | Outcome<br>Measurement<br>Tools                                                                                                                                                                             | Overall<br>MMAT<br>Grade |
|---------------------------------------|----------------------------------------------------------------------------------------------------------------------------------------------------|---------|--------------------------------------------------------------------------|--------------------------|-------------------------------------------|-------------------------------------------------------------------------------------------------------------------------------------------------------------------------------------------------------------------------------------------------------------------------------------------------------------------------------------------------|-----------------------------------------------------------------------------------------|-------------------------------------------------------------------------------------------------------------------------------------------------------------------------------|-----------------------------------------------------------------------------|-------------------------------------------------------------------------------------------------------------------------------------------------------------------------------------------------------------|--------------------------|
| Cancello<br>et al.<br>(2020)<br>[25]  | Determinants of<br>the Lifestyle<br>Changes during<br>COVID-19<br>Pandemic in the<br>Residents of<br>Northern Italy                                | Italy   | Cross-<br>sectional,<br>study via self-<br>administered<br>online survey | Stay-at-<br>home order   | 18 years or over                          | To observe the effects of<br>the lockdown on the<br>reported lifestyle habits<br>changes. The purpose of<br>this survey was to give a<br>picture of the Italian<br>population perception of<br>changes occurred in the<br>main components of<br>lifestyle (i.e., eating<br>habits, PA, sleep,<br>smoking) and to identify<br>their determinants | <i>n</i> = 490                                                                          | 83.7% female;<br>58.4% high<br>education level;<br>86.1% cohabiting;<br>14.5% 30 years or<br>less; 65.1% 31–60;<br>20.4% >60 years; <i>n</i><br>= 272 active pre-<br>lockdown | PA                                                                          | Single question<br>(Unvalidated)                                                                                                                                                                            | ***                      |
| Carriedo<br>et al.<br>(2020a)<br>[26] | COVID-19,<br>Psychological<br>Well-being and<br>Physical<br>Activity Levels<br>in Older Adults<br>During the<br>Nationwide<br>Lockdown in<br>Spain | Spain   | Cross-<br>sectional,<br>study via self-<br>administered<br>online survey | Stay-at-<br>home order   | Aged 60 years or<br>over. Living in Spain | To assess resilience,<br>affect, depressive<br>symptoms, and PA levels<br>during the COVID-19<br>pandemic in Spanish<br>older adults; and to<br>evaluate the relationship<br>between their<br>psychological well-being<br>and meeting PA<br>recommendations                                                                                     | <i>n</i> = 483<br>Mean age =<br>65.49 years<br>( $\sigma$ 5.14)<br>Range 60–92<br>years | No details                                                                                                                                                                    | PA<br><br>Sitting<br>time<br><br>Resilience<br><br>Affect<br><br>Depression | IPAQ-SF<br><br>The Connor-<br>Davidson CD-<br>RISC resilience<br>scale<br><br>Positive and<br>Negative<br>Affect<br>Schedule<br><br>Adaptation of<br>Six-item self-<br>report scale<br>(last 12-<br>months) | ****                     |

Table S1. Study characteristics continued.

| Authors/<br>Year                     | Title                                                                                                     | Country | Study Design                                               | COVID-19<br>Restrictions | Inclusion/Exclusion<br>Criteria | Aim                                                                                                                                                                                                                                            | Participants                                                                | Pertinent<br>Participant<br>Demographics                                 | Relevant<br>Outcomes     | Outcome<br>Measurement<br>Tools                                          | Overall<br>MMAT<br>Grade |
|--------------------------------------|-----------------------------------------------------------------------------------------------------------|---------|------------------------------------------------------------|--------------------------|---------------------------------|------------------------------------------------------------------------------------------------------------------------------------------------------------------------------------------------------------------------------------------------|-----------------------------------------------------------------------------|--------------------------------------------------------------------------|--------------------------|--------------------------------------------------------------------------|--------------------------|
| Carriedo et al. (2020b) [27]         | Resilience and physical activity in people under home isolation due to COVID-19: A preliminary evaluation | Spain   | Cross-sectional, study via self-administered online survey | Stay-at-home order       | General population              | To assess general Spanish population resilience and PA levels after the first week of the shelter-in-place health order issued, and to evaluate the relationship between resilience and PA levels                                              | $n = 1795$<br>Mean age = 40.54 years ( $\sigma$ 15.68)<br>Range 16–82 years | 64% female                                                               | PA<br><br>Resilience     | IPAQ-SF<br><br>The Connor-Davidson CD-RISC resilience scale              | ***                      |
| Castaneda-Babarro et al. (2020) [28] | Physical Activity Change during COVID-19 Confinement                                                      | Spain   | Cross-sectional, study via self-administered online survey | Stay-at-home order       | Healthy adults Aged 18–64 years | To analyse self-reported PA and sedentary behaviour before and during lockdown caused by COVID-19 in a Spanish healthy adult population.                                                                                                       | $n = 3800$<br>Mean age = 42.70 years ( $\sigma$ 10.4)<br>Range 18–64 years  | 46% female<br>7% students<br>78% employed; 0% study and work; 5% nothing | PA<br><br>Sedentary time | IPAQ-SF                                                                  | ****                     |
| Cecchini et al. (2021) [29]          | A longitudinal study on depressive symptoms and physical activity during the Spanish lockdown             | Spain   | Longitudinal study via self-administered online survey     | Stay-at-home order       | General population              | To measure prevalence and severity of depressive symptoms in Spanish confined people by collecting longitudinal data that assess their changes. To provide a concrete guide for PA in order to face this challenge efficiently and effectively | $n = 595$<br>Mean age = 45.60 years ( $\sigma$ 15.17)<br>Range 18–84 years  | 57.5% female<br>$n = 482$ (81 previously physically active)              | PA<br><br>Depression     | IPAQ-SF<br><br>Adaptation of Six-item self-report scale (last 12-months) | ***                      |

**Table S1.** Study characteristics continued.

| Authors/<br>Year               | Title                                                                                                           | Country | Study Design                                                             | COVID-19<br>Restrictions                                          | Inclusion/Exclusion<br>Criteria                                                               | Aim                                                                                                                                                                                                                                                                                                      | Participants                                                      | Pertinent<br>Participant<br>Demographics                                                     | Relevant<br>Outcomes | Outcome<br>Measurement<br>Tools                             | Overall<br>MMAT<br>Grade |
|--------------------------------|-----------------------------------------------------------------------------------------------------------------|---------|--------------------------------------------------------------------------|-------------------------------------------------------------------|-----------------------------------------------------------------------------------------------|----------------------------------------------------------------------------------------------------------------------------------------------------------------------------------------------------------------------------------------------------------------------------------------------------------|-------------------------------------------------------------------|----------------------------------------------------------------------------------------------|----------------------|-------------------------------------------------------------|--------------------------|
| Chang et<br>al. (2020)<br>[30] | Exercise<br>Behavior and<br>Mood during<br>the COVID-<br>19 Pandemic<br>in Taiwan:<br>Lessons for<br>the Future | Taiwan  | Cross-<br>sectional,<br>study via self-<br>administered<br>online survey | Social<br>distancing/self-<br>isolation, no<br>formal<br>lockdown | General population<br>excluded if presence of<br>COVID-19 symptoms<br>or a positive diagnosis | To determine whether<br>and how COVID-19 has<br>affected exercise<br>behaviour and mental<br>health status in Taiwan.<br>Additionally, a model<br>was established to<br>predict the changes in<br>exercise behaviour<br>during similar future<br>pandemics, and<br>potential moderators<br>were examined | <i>n</i> = 1114<br>Mean age =<br>35.90 years<br>( $\sigma$ 15.16) | 53.9% female<br>489 graduate<br>level education<br>or above.<br>1026 live urban,<br>86 rural | PA                   | 2 Individually<br>constructed<br>questions<br>(unvalidated) | ***                      |



Table S1. Study characteristics continued.

| Authors/<br>Year                    | Title                                                                                                                                                                 | Country | Study Design                                                             | COVID-19<br>Restrictions | Inclusion/Exclusion<br>Criteria | Aim                                                                                                                                                                                                                                                                                                                                                                                                                                                                                                    | Participants                                                    | Pertinent<br>Participant<br>Demographics                                      | Relevant<br>Outcomes                            | Outcome<br>Measurement<br>Tools                                                                                                                                             | Overall<br>MMAT<br>Grade |
|-------------------------------------|-----------------------------------------------------------------------------------------------------------------------------------------------------------------------|---------|--------------------------------------------------------------------------|--------------------------|---------------------------------|--------------------------------------------------------------------------------------------------------------------------------------------------------------------------------------------------------------------------------------------------------------------------------------------------------------------------------------------------------------------------------------------------------------------------------------------------------------------------------------------------------|-----------------------------------------------------------------|-------------------------------------------------------------------------------|-------------------------------------------------|-----------------------------------------------------------------------------------------------------------------------------------------------------------------------------|--------------------------|
| Chirico<br>et al.<br>(2020)<br>[31] | COVID-19<br>Outbreak and<br>Physical<br>Activity in the<br>Italian<br>Population: A<br>Cross-Sectional<br>Analysis of the<br>Underlying<br>Psychosocial<br>Mechanisms | Italy   | Cross-<br>sectional,<br>study via self-<br>administered<br>online survey | Stay-at-<br>home order   | General population              | To survey the Italian<br>population on its PA<br>behaviour and how this<br>latter was modelled by<br>psychosocial variables<br>during the emergency<br>contingencies and<br>measures taken for<br>COVID-19 outbreak.<br>Given the specific<br>impact of the virus on<br>the Lombardy region, a<br>further aim was to<br>evaluate specific<br>differences between<br>Lombardy inhabitants<br>sample and the rest of<br>the Italian population<br>sample within the<br>integrated model key<br>variables | <i>n</i> = 2398<br>Mean age<br>31.84 years<br>( $\sigma$ 12.55) | 57.6% females;<br>56.7% educated<br>to degree or<br>more; 85.9%<br>cohabiting | Autonomous<br>Motivation                        | Behavioural<br>Regulation in<br>Exercise<br>Questionnaire<br>version 3                                                                                                      | **                       |
|                                     |                                                                                                                                                                       |         |                                                                          |                          |                                 |                                                                                                                                                                                                                                                                                                                                                                                                                                                                                                        |                                                                 |                                                                               | Theory of<br>Planned<br>Behaviour<br>Constructs | Scale developed<br>based on<br>measures from<br>previous studies<br>covering:<br>attitudes,<br>subjective norms,<br>perceived<br>behavioural<br>confidence and<br>intention |                          |
|                                     |                                                                                                                                                                       |         |                                                                          |                          |                                 |                                                                                                                                                                                                                                                                                                                                                                                                                                                                                                        |                                                                 |                                                                               | Anxiety                                         | State-Trait<br>Anxiety<br>Inventory                                                                                                                                         |                          |
|                                     |                                                                                                                                                                       |         |                                                                          |                          |                                 |                                                                                                                                                                                                                                                                                                                                                                                                                                                                                                        |                                                                 |                                                                               | PA                                              | Individually<br>constructed<br>question<br>(unvalidated)                                                                                                                    |                          |

Table S1. Study characteristics continued.

| Authors/ Year                | Title                                                                                                                             | Country | Study Design                                               | COVID-19 Restrictions                                                                                                                                                                                              | Inclusion/Exclusion Criteria                                                                                                                                                                                                                             | Aim                                                                                                                                                                                                                                                | Participants                           | Pertinent Participant Demographics                                                                         | Relevant Outcomes                                                     | Outcome Measurement Tools                                                           | Overall MMAT Grade |
|------------------------------|-----------------------------------------------------------------------------------------------------------------------------------|---------|------------------------------------------------------------|--------------------------------------------------------------------------------------------------------------------------------------------------------------------------------------------------------------------|----------------------------------------------------------------------------------------------------------------------------------------------------------------------------------------------------------------------------------------------------------|----------------------------------------------------------------------------------------------------------------------------------------------------------------------------------------------------------------------------------------------------|----------------------------------------|------------------------------------------------------------------------------------------------------------|-----------------------------------------------------------------------|-------------------------------------------------------------------------------------|--------------------|
| Colley et al. (2020) [32]    | Exercise and screen time during the COVID-19 pandemic                                                                             | Canada  | Cross-sectional study via self-administered online survey  | Varied between states, from stay-at-home orders, to social distancing with variations on what facilities were closed.                                                                                              | Inclusion - general population aged 15 or over Excluded - living on reserves and Aboriginal settlements; full-time members of Canadian Armed Forces; institutionalised population; households in extremely remote areas with very low population density | To describe the exercise habits and changes to screen time behaviours among participants of the Canadian Perspectives Survey Series (CPSS) and to examine the relationships between these behaviours and self-perceived mental and general health. | <i>n</i> = 4524<br>Aged 20+            | Not stated                                                                                                 | Health and Mental Health<br><br>PA—Exercise habits<br><br>Screen time | Questions from Canadian Community Health Survey and Canadian Health Measures Survey | ***                |
| Constandt et al. (2020) [33] | Exercising in Times of Lockdown: An Analysis of the Impact of COVID-19 on Levels and Patterns of Exercise among Adults in Belgium | Belgium | Cross-sectional, study via self-administered online survey | Lockdown light. Schools closed, work from home where possible, encouraged to exercise at home and outdoors but alone, with family members or 1 friend. Forbidden to travel to exercise. All fitness centres closed | Resident of Flanders region, northern Belgium, aged 18–75 years                                                                                                                                                                                          | To examine the influence of the COVID-19 lockdown on adults' exercise behaviours in Flanders                                                                                                                                                       | <i>n</i> = 13,515<br>Range 18–75 years | 50.5% female; 34.3% higher education degree; 94.4% high school degree or above; 39.2% had children at home | PA—Exercise                                                           | Individually constructed questionnaire (unclear if validated)                       | ***                |

Table S1. Study characteristics continued.

| Authors/<br>Year                    | Title                                                                                                                                                       | Country                  | Study Design                                                             | COVID-19<br>Restrictions             | Inclusion/Exclusion<br>Criteria                           | Aim                                                                                                                                                                                                                                                                                                                                                                              | Participants                                               | Pertinent<br>Participant<br>Demographics                                                                                                                   | Relevant<br>Outcomes                                 | Outcome<br>Measurement<br>Tools                                                                                                               | Overall<br>MMAT<br>Grade |
|-------------------------------------|-------------------------------------------------------------------------------------------------------------------------------------------------------------|--------------------------|--------------------------------------------------------------------------|--------------------------------------|-----------------------------------------------------------|----------------------------------------------------------------------------------------------------------------------------------------------------------------------------------------------------------------------------------------------------------------------------------------------------------------------------------------------------------------------------------|------------------------------------------------------------|------------------------------------------------------------------------------------------------------------------------------------------------------------|------------------------------------------------------|-----------------------------------------------------------------------------------------------------------------------------------------------|--------------------------|
| Coughenour<br>et al. (2020)<br>[34] | Changes in<br>Depression<br>and Physical<br>Activity<br>Among<br>College<br>Students on a<br>Diverse<br>Campus After<br>a COVID-19<br>Stay-at-Home<br>Order | USA<br>(South<br>Nevada) | Cross-<br>sectional,<br>study via self-<br>administered<br>online survey | State-wide<br>stay-at-<br>home order | Aged over 17 years,<br>student at University<br>of Nevada | To determine if there<br>was a change in<br>participants' PA mins<br>prior to versus after<br>stay-at-home orders<br>were issued in the<br>State of Nevada, to<br>determine if there<br>was a change in<br>depression scores<br>prior to versus after<br>stay-at-home orders<br>and understand<br>predictors of<br>depression score and<br>PA changes among<br>college students. | $n = 194$<br>Mean age =<br>25.11 years<br>( $\sigma$ 7.84) | 72.2% female;<br>High mean grade<br>point average of<br>3.41 (SD 0.46);<br>Ethnicity: White<br>18%; Asian 46%;<br>Black 25%;<br>Hispanic 34%;<br>Other 17% | PA<br><br><br><br><br><br><br><br><br><br>Depression | Individually<br>constructed<br>questionnaire<br>(Validated)<br><br><br><br><br><br><br><br><br><br>Patient Health<br>Questionnaire<br>(PHQ-9) | ****                     |

Table S1. Study characteristics continued.

| Authors/<br>Year               | Title                                                                                                                                            | Country                      | Study Design                                                             | COVID-19<br>Restrictions              | Inclusion/Exclusion<br>Criteria                           | Aim                                                                                                                                                                                                                                                                                                                                  | Participants                                                                                         | Pertinent<br>Participant<br>Demographics                                           | Relevant<br>Outcomes | Outcome<br>Measurement<br>Tools     | Overall<br>MMAT<br>Grade |
|--------------------------------|--------------------------------------------------------------------------------------------------------------------------------------------------|------------------------------|--------------------------------------------------------------------------|---------------------------------------|-----------------------------------------------------------|--------------------------------------------------------------------------------------------------------------------------------------------------------------------------------------------------------------------------------------------------------------------------------------------------------------------------------------|------------------------------------------------------------------------------------------------------|------------------------------------------------------------------------------------|----------------------|-------------------------------------|--------------------------|
| Dunca et<br>al. (2020)<br>[35] | Perceived<br>change in<br>physical<br>activity<br>levels and<br>mental<br>health<br>during<br>COVID-19:<br>Findings<br>among adult<br>twin pairs | USA<br>(Washington<br>state) | Cross-<br>sectional,<br>study via self-<br>administered<br>online survey | Social<br>distancing/stay-<br>at-home | Identical and<br>fraternal adult twins.<br>Aged 18+ years | To investigate<br>perceived changes in<br>PA and mental health<br>in response to COVID-<br>19 mitigation strategies<br>in identical and<br>fraternal adult twins.<br>To examine whether<br>associations between<br>perceived changes in<br>PA and mental health<br>were confounded by<br>genetic and shared<br>environmental factors | $n = 3971$<br>Mean age =<br>50.4 years<br>( $\sigma$ 16.0)<br>$n = 909$<br>[77%] same-<br>sex pairs) | 69.2% female<br>95.5% white<br>non-Hispanic<br>60.1% identical,<br>39.9% fraternal | PA/exercise          | Single<br>question<br>(Unvalidated) | ***                      |
|                                |                                                                                                                                                  |                              |                                                                          |                                       |                                                           |                                                                                                                                                                                                                                                                                                                                      |                                                                                                      |                                                                                    | Stress               | Perceived<br>Stress Scale           |                          |
|                                |                                                                                                                                                  |                              |                                                                          |                                       |                                                           |                                                                                                                                                                                                                                                                                                                                      |                                                                                                      |                                                                                    | Anxiety              | Brief<br>Symptom<br>Inventory       |                          |

Table S1. Study characteristics continued.

| Authors/<br>Year                      | Title                                                                                                                                                        | Country | Study Design                                                                                            | COVID-19<br>Restrictions                                                                                               | Inclusion/Exclusion<br>Criteria                                                                                       | Aim                                                                                                                                                                                                                                                                        | Participants                                                                        | Pertinent<br>Participant<br>Demographics                                                                                                                      | Relevant<br>Outcomes | Outcome<br>Measurement<br>Tools                                                                                      | Overall<br>MMAT<br>Grade |
|---------------------------------------|--------------------------------------------------------------------------------------------------------------------------------------------------------------|---------|---------------------------------------------------------------------------------------------------------|------------------------------------------------------------------------------------------------------------------------|-----------------------------------------------------------------------------------------------------------------------|----------------------------------------------------------------------------------------------------------------------------------------------------------------------------------------------------------------------------------------------------------------------------|-------------------------------------------------------------------------------------|---------------------------------------------------------------------------------------------------------------------------------------------------------------|----------------------|----------------------------------------------------------------------------------------------------------------------|--------------------------|
| Fallon et<br>al. (2020)<br>[36]       | Adverse effects<br>of COVID-19-<br>related<br>lockdown on<br>pain, physical<br>activity and<br>psychological<br>well-being in<br>people with<br>chronic pain | UK      | Cross-sectional<br>analytic study<br>(Non-<br>randomised)<br>via self-<br>administered<br>online survey | Stay-at-home<br>order, once a<br>day exercise<br>permitted                                                             | UK adult residents<br>aged >18 years. Self-<br>reported sufferer of<br>chronic pain or non-<br>pain for control group | To capture the<br>effects of the<br>COVID-19<br>pandemic, and<br>corresponding UK<br>lockdown<br>restrictions, on<br>pain, psychological<br>wellbeing and PA<br>levels in a group of<br>participants<br>suffering from<br>chronic pain<br>compared to a non-<br>pain group | $n = 519$<br>Mean age =<br>43.98 years<br>( $\sigma$ 13.38)<br>Range 18–79<br>years | 90.56% female<br>$n = 431$ chronic<br>pain<br>$n = 88$ healthy<br>controls                                                                                    | Pain                 | Visual analogue<br>scales. Pain<br>Catastrophizing<br>Scale, an adapted<br>version of the<br>Brief pain<br>Inventory | *****                    |
| Fearnbach<br>et al.<br>(2021)<br>[37] | Factors<br>Protecting<br>against a<br>Decline in<br>Physical<br>Activity during<br>the COVID-19<br>Pandemic                                                  | USA     | Cross-<br>sectional,<br>study via self-<br>administered<br>online survey                                | Varied<br>between<br>states—<br>included stay-<br>at-home<br>orders, social<br>distancing,<br>closure of<br>facilities | Adults aged 18 years<br>or over with access to<br>the internet                                                        | The purpose of this<br>secondary analysis<br>of the Pennington<br>Biomedical COVID<br>Health Behaviours<br>Survey was to<br>identify individual-<br>level factors that<br>helped people<br>maintain PA levels<br>amid the initial<br>COVID-19<br>shutdown                  | $n = 4376$<br>Mean age =<br>52 years<br>( $\sigma$ 15)                              | Mean data<br>80% femal<br>81% household<br>size >1.<br>Mean PA/week<br>348 mins ( $\sigma$ 403)<br>or 1,453 ( $\sigma$ 1982)<br>MET mins/week<br>pre-COVID-19 | PA                   | Long-form PA<br>questionnaire<br>modified from the<br>Nurses Health PA<br>Questionnaire<br>(Validated)               | ***                      |

**Table S1.** Study characteristics continued.

| Authors/<br>Year           | Title                                                                                                                                            | Country                                | Study Design                                               | COVID-19<br>Restrictions                                                                       | Inclusion/Exclusion<br>Criteria                         | Aim                                                                                                                                                                                                                    | Participants                                                              | Pertinent<br>Participant<br>Demographics                                                                                                                 | Relevant<br>Outcomes       | Outcome<br>Measurement<br>Tools                                                                   | Overall<br>MMAT<br>Grade |
|----------------------------|--------------------------------------------------------------------------------------------------------------------------------------------------|----------------------------------------|------------------------------------------------------------|------------------------------------------------------------------------------------------------|---------------------------------------------------------|------------------------------------------------------------------------------------------------------------------------------------------------------------------------------------------------------------------------|---------------------------------------------------------------------------|----------------------------------------------------------------------------------------------------------------------------------------------------------|----------------------------|---------------------------------------------------------------------------------------------------|--------------------------|
| Gallè et al. (2020) [38]   | Sedentary Behaviours and Physical Activity of Italian Undergraduate Students during Lockdown at the Time of CoViD-19 Pandemic                    | Italy                                  | Cross-sectional, study via self-administered online survey | Stay-at-home order                                                                             | Student at 1 of 3 Italian universities                  | To evaluate the sedentary activities and PA levels the students assumed during home-confinement with respect to their previous habits, and to investigate the possible determinants of enduring PA during the lockdown | $n = 1430$<br>Mean age = 22.9 years ( $\sigma$ 3.5)                       | 65.5% female<br>94.1% Italian<br>60.7% reside on campus.<br>Mean PA = 520 min/week (SD 820) Mean SB = 240 min/day (SD 240) pre-COVID-19                  | PA                         | IPAQ-SF plus 3 additional questions                                                               | ****                     |
| Gildner et al. (2021) [39] | Exercise routine change is associated with prenatal depression scores during the COVID-19 pandemic among pregnant women across the United States | USA (All states including Puerto Rico) | Longitudinal, study via self-administered online survey    | Varied between states - included stay-at-home orders, social distancing, closure of facilities | Pregnant women, aged 18 years or over living in the USA | To assess how the COVID-19 pandemic has affected pregnant women's wellbeing                                                                                                                                            | $n = 1856$<br>Mean age = 31.3 years ( $\sigma$ 4.30)<br>Range 18–47 years | Weeks pregnant at time of survey 26.1 ( $\sigma$ 8.62, range 4–41)<br>87% white<br>55.2% household income > \$100,000<br>77.1% degree educated or higher | Depression<br><br>Exercise | Edinburgh Postnatal Depression Survey<br><br>Individually constructed questionnaire (Unvalidated) | ***                      |

Table S1. Study characteristics continued.

| Authors/<br>Year                   | Title                                                                                                                                                                                                             | Country          | Study Design                                                             | COVID-19<br>Restrictions                                                                                                                                                                                                                                                                                      | Inclusion/Exclusion<br>Criteria                                       | Aim                                                                                                                                                                                                                                                                                     | Participants                                                                      | Pertinent<br>Participant<br>Demographics                                                                                                                     | Relevant<br>Outcomes                                               | Outcome<br>Measurement<br>Tools                                                                                                                                                                      | Overall<br>MMAT<br>Grade |
|------------------------------------|-------------------------------------------------------------------------------------------------------------------------------------------------------------------------------------------------------------------|------------------|--------------------------------------------------------------------------|---------------------------------------------------------------------------------------------------------------------------------------------------------------------------------------------------------------------------------------------------------------------------------------------------------------|-----------------------------------------------------------------------|-----------------------------------------------------------------------------------------------------------------------------------------------------------------------------------------------------------------------------------------------------------------------------------------|-----------------------------------------------------------------------------------|--------------------------------------------------------------------------------------------------------------------------------------------------------------|--------------------------------------------------------------------|------------------------------------------------------------------------------------------------------------------------------------------------------------------------------------------------------|--------------------------|
| Ingram<br>et al.<br>(2020)<br>[40] | Changes in Diet,<br>Sleep, and Physical<br>Activity Are<br>Associated with<br>Differences in<br>Negative Mood<br>During COVID-19<br>Lockdown                                                                      | UK<br>(Scotland) | Cross-<br>sectional,<br>study via self-<br>administered<br>online survey | Stay-at-home<br>order, once a day<br>exercise<br>permitted with<br>easing of<br>restrictions at<br>time 2—2 weeks<br>later, meeting<br>outside with one<br>other household<br>allowed and T3—<br>2 weeks later,<br>meeting with 2<br>households<br>allowed outdoors<br>shielding group<br>restrictions lifted | Scottish adult or long<br>term resident                               | To examine the<br>associations<br>between socio-<br>demographic<br>factors and<br>COVID-induced<br>changes, and<br>health behaviours<br>(changes in<br>alcohol<br>consumption, diet,<br>sleep, and PA)                                                                                  | $n = 399$<br>Mean age =<br>32.4 years<br>( $\sigma$ 11.4)<br>Range 18–72<br>years | 56.4% female.<br>81.2% live<br>urban. 88%<br>cohabiting                                                                                                      | PA<br><br><br><br><br><br><br><br>Mood                             | Individually<br>created scale<br>(Unvalidated)<br><br><br><br><br><br><br>abbreviated<br>Profile of<br>Mood State<br>(POMS) scale                                                                    | ***                      |
| Jacob et<br>al. (2020)<br>[41]     | The relationship<br>between physical<br>activity and mental<br>health in a sample<br>of the UK public: A<br>cross-sectional<br>study during the<br>implementation of<br>COVID-19 social<br>distancing<br>measures | UK               | Cross-<br>sectional,<br>study via self-<br>administered<br>online survey | Stay-at-home<br>order, once a day<br>exercise<br>permitted                                                                                                                                                                                                                                                    | Adults aged 18 years<br>or over, residing UK<br>and social-distancing | The aim of the<br>present study was<br>to investigate the<br>cross-sectional<br>association<br>between PA levels<br>with depressive<br>symptoms, anxiety<br>symptoms, and<br>positive mental<br>well-being in a<br>sample of the UK<br>public social<br>distancing owing<br>to COVID-19 | $n = 902$                                                                         | 63.8% female.<br>55.2% married<br>58.6%<br>employed; 67%<br>earn > 25k per<br>year<br>50.1% of people<br>35–64 years.<br>31.6% 18–34.<br>18.3% 65 or<br>more | Mental<br>Health<br><br><br>Mental<br>Well-<br>being<br><br><br>PA | Beck Anxiety<br>and<br>Depression<br>Inventory<br><br><br>The Short<br>Warwick-<br>Edinburgh<br>Mental Well-<br>being Scale<br><br><br>Individually<br>constructed<br>questionnaire<br>(Unvalidated) | ***                      |

Table S1. Study characteristics continued.

| Authors/<br>Year                                                                   | Title                                                                                                                                                                                  | Country  | Study Design                                                         | COVID-19<br>Restrictions                                                                                                                        | Inclusion/Exclusion<br>Criteria                                                         | Aim                                                                                                                                                                                                                                                                                                                                                                                   | Participants                                                  | Pertinent<br>Participant<br>Demographics                                                                                                                                           | Relevant<br>Outcomes | Outcome<br>Measurement<br>Tools                                                                                                                                                  | Overall<br>MMAT<br>Grade |
|------------------------------------------------------------------------------------|----------------------------------------------------------------------------------------------------------------------------------------------------------------------------------------|----------|----------------------------------------------------------------------|-------------------------------------------------------------------------------------------------------------------------------------------------|-----------------------------------------------------------------------------------------|---------------------------------------------------------------------------------------------------------------------------------------------------------------------------------------------------------------------------------------------------------------------------------------------------------------------------------------------------------------------------------------|---------------------------------------------------------------|------------------------------------------------------------------------------------------------------------------------------------------------------------------------------------|----------------------|----------------------------------------------------------------------------------------------------------------------------------------------------------------------------------|--------------------------|
| Karuc et al.<br>(2020)<br>[42]                                                     | Moderators of<br>Change in<br>Physical<br>Activity<br>Levels during<br>Restrictions<br>Due to<br>COVID-19<br>Pandemic in<br>Young Urban<br>Adults                                      | Croatia  | Cross-sectional,<br>study via self-<br>administered<br>online survey | Stay-at-home order                                                                                                                              | Previously enrolled<br>in longitudinal<br>study between<br>2014–2017                    | To investigate the<br>moderators of<br>change in PA<br>level after 30 days<br>of restrictions<br>due to the<br>COVID-19<br>pandemic in<br>young urban<br>adults                                                                                                                                                                                                                       | $n = 91$<br>Range 20–<br>21 years old                         | 65% female<br>Mean age = 21.6<br>( $\sigma$ 0.4).35% male,<br>mean age = 21.5<br>( $\sigma$ 0.3)<br>MVPA<br>(min/day)<br>median female<br>120, median<br>male 135 pre-<br>COVID-19 | PA                   | School Health<br>Action,<br>Planning, and<br>Evaluation<br>System<br>(SHAPES)<br>questionnaire.<br>PA change in<br>patterns<br>assessed<br>separately<br>with 1-item<br>question | ****                     |
| Katewongs<br>a et al.<br>(2020) Only<br>data<br>relating to<br>2020 subset<br>[43] | The effects of<br>the COVID-19<br>pandemic on<br>the physical<br>activity of the<br>Thai<br>population:<br>Evidence from<br>Thailand's<br>Surveillance<br>on Physical<br>Activity 2020 | Thailand | Cross-sectional,<br>study via self-<br>administered<br>online survey | Nationwide<br>overnight<br>curfew/Social<br>distancing /facility<br>closures/restricting<br>public<br>gatherings/encoura<br>ged to stay-at-home | Adults with<br>internet access.<br>Clear gender<br>specification on<br>Facebook profile | To compare PA<br>level prior to and<br>during the<br>pandemic in<br>Thailand. To<br>document<br>changes in the<br>types and<br>amount of PA<br>among differing<br>groups of the<br>Thai population<br>based on<br>sociodemographi<br>c characteristics.<br>To assess<br>whether people<br>exposed to the<br>national<br>campaign, had<br>better PA<br>outcomes during<br>the pandemic | $n = 4482$ in<br>(2020 data<br>only)<br>Range 18–<br>64 years | 46.6and female;<br>68.8% aged. 18–<br>39 years<br>54.7% active pre-<br>COVID-19                                                                                                    | PA                   | Global<br>Physical<br>Activity<br>Questionnaire                                                                                                                                  | ***                      |



**Table S1.** Study characteristics continued.

| Authors/<br>Year              | Title                                                                                                  | Country | Study Design                                                         | COVID-19<br>Restrictions | Inclusion/Exclusion<br>Criteria                                                                                                                                                                                                                                                          | Aim                                                                                                                                                                                                                                                                                      | Participants                                                       | Pertinent<br>Participant<br>Demographics                                   | Relevant<br>Outcomes                    | Outcome<br>Measurement<br>Tools                | Overall<br>MMAT<br>Grade |
|-------------------------------|--------------------------------------------------------------------------------------------------------|---------|----------------------------------------------------------------------|--------------------------|------------------------------------------------------------------------------------------------------------------------------------------------------------------------------------------------------------------------------------------------------------------------------------------|------------------------------------------------------------------------------------------------------------------------------------------------------------------------------------------------------------------------------------------------------------------------------------------|--------------------------------------------------------------------|----------------------------------------------------------------------------|-----------------------------------------|------------------------------------------------|--------------------------|
| Kaur et al.<br>(2020)<br>[44] | Physical<br>Fitness and<br>Exercise<br>During the<br>COVID-19<br>Pandemic: A<br>Qualitative<br>Enquiry | India   | Phenomenolog<br>y—via semi-<br>structured<br>telephone<br>interviews | Stay-at-home order       | Aged 18 years or<br>over, Previously<br>gym dependent for<br>exercise (45+ mins),<br>continuing home<br>workout for last 6<br>months. Excluded -<br>irregular gym<br>users, those<br>practicing other<br>exercises, any<br>physical or<br>psychological<br>condition or on<br>medication | To understand<br>people's unique<br>experiences<br>during the period<br>of lockdown due<br>to COVID-19 and<br>explore the ways<br>in which regular<br>exercise<br>engagements<br>helped them deal<br>with the<br>psychological<br>and physical<br>consequences of<br>home<br>confinement | <i>n</i> = 22<br>Mean age =<br>26.5 years<br>Range 19–<br>34 years | 9% female<br>19 single<br>15 living alone<br>All middle or<br>higher class | PA<br>experiences<br>during<br>lockdown | Semi-<br>Structured<br>telephone<br>interviews | *****                    |

Table S1. Study characteristics continued.

| Authors/<br>Year                 | Title                                                                                                                                                                           | Country | Study Design                                                         | COVID-19<br>Restrictions | Inclusion/Exclusion<br>Criteria                                                                                                                                       | Aim                                                                                                                                                                                                                                                                                                                                                                                                                                                                                                    | Participants                                              | Pertinent<br>Participant<br>Demographics                                                                                                                                           | Relevant<br>Outcomes                            | Outcome<br>Measurement<br>Tools                                                                                            | Overall<br>MMAT<br>Grade |
|----------------------------------|---------------------------------------------------------------------------------------------------------------------------------------------------------------------------------|---------|----------------------------------------------------------------------|--------------------------|-----------------------------------------------------------------------------------------------------------------------------------------------------------------------|--------------------------------------------------------------------------------------------------------------------------------------------------------------------------------------------------------------------------------------------------------------------------------------------------------------------------------------------------------------------------------------------------------------------------------------------------------------------------------------------------------|-----------------------------------------------------------|------------------------------------------------------------------------------------------------------------------------------------------------------------------------------------|-------------------------------------------------|----------------------------------------------------------------------------------------------------------------------------|--------------------------|
| Kaushal et<br>al. (2020)<br>[45] | Social<br>Cognition and<br>Socioecologica<br>l Predictors of<br>Home-Based<br>Physical<br>Activity<br>Intentions,<br>Planning, and<br>Habits during<br>the COVID-19<br>Pandemic | USA     | Cross-sectional,<br>study via self-<br>administered<br>online survey | Stay-at-home order       | Aged over 18 years,<br>proficient in<br>English, residing in<br>USA states with<br>lockdown<br>measures in place<br>and gyms and<br>recreation centres<br>were closed | To integrate<br>variables of the<br>physical<br>environment<br>derived from<br>socioecological<br>models alongside<br>constructs from<br>traditional social<br>cognition theories<br>to predict home-<br>based PA. To test<br>the effects of 2<br>socioecological<br>constructs,<br>namely,<br>availability and<br>use of home<br>exercise<br>equipment and<br>constructs from<br>the IBC model on<br>intentions and<br>habits with<br>respect to home-<br>based PA during<br>the COVID-19<br>pandemic | $n = 429$<br>Mean age =<br>47.1 years<br>( $\sigma$ 6.26) | 60% female<br>53% in good or<br>excellent health<br>55.1% degree or<br>higher<br>52.9%<br>married/commo<br>n law<br>Mean PA = 231<br>mins/week<br>( $\sigma$ 116) pre-<br>COVID-19 | Theory of<br>Planned<br>Behaviour<br>Constructs | Scale<br>developed<br>based on<br>measures<br>used in<br>previous<br>studies<br>(expectations<br>of PA in next<br>2 weeks) | ****                     |
|                                  |                                                                                                                                                                                 |         |                                                                      |                          |                                                                                                                                                                       |                                                                                                                                                                                                                                                                                                                                                                                                                                                                                                        |                                                           |                                                                                                                                                                                    | Planning                                        | Scale<br>developed<br>based on<br>measures<br>used in<br>previous<br>studies                                               |                          |
|                                  |                                                                                                                                                                                 |         |                                                                      |                          |                                                                                                                                                                       |                                                                                                                                                                                                                                                                                                                                                                                                                                                                                                        |                                                           |                                                                                                                                                                                    | PA Habit                                        | Self-report<br>behaviour<br>index scale                                                                                    |                          |
|                                  |                                                                                                                                                                                 |         |                                                                      |                          |                                                                                                                                                                       |                                                                                                                                                                                                                                                                                                                                                                                                                                                                                                        |                                                           |                                                                                                                                                                                    | Autono-<br>mous<br>Motivation                   | Individually<br>constructed<br>questions                                                                                   |                          |
|                                  |                                                                                                                                                                                 |         |                                                                      |                          |                                                                                                                                                                       |                                                                                                                                                                                                                                                                                                                                                                                                                                                                                                        |                                                           |                                                                                                                                                                                    | Ex<br>Equipment<br>availability                 | Individually<br>constructed<br>questions                                                                                   |                          |
|                                  |                                                                                                                                                                                 |         |                                                                      |                          |                                                                                                                                                                       |                                                                                                                                                                                                                                                                                                                                                                                                                                                                                                        |                                                           |                                                                                                                                                                                    | Past PA<br>Behaviour                            | Individually<br>constructed<br>questions<br>(Validated)                                                                    |                          |

**Table S1.** Study characteristics continued.

| Authors/<br>Year               | Title                                                                                                                                                                    | Country    | Study design                                                             | COVID-19<br>Restrictions                                                                                               | Inclusion/Exclusion<br>Criteria                                                                                                    | Aim                                                                                                                                                                                                                                                                                                                                        | Participants    | Pertinent<br>Participant<br>Demographics                                                            | Relevant<br>Outcomes                                                                         | Outcome<br>Measurement<br>Tools                                                                                                                                 | Overall<br>MMAT<br>Grade |
|--------------------------------|--------------------------------------------------------------------------------------------------------------------------------------------------------------------------|------------|--------------------------------------------------------------------------|------------------------------------------------------------------------------------------------------------------------|------------------------------------------------------------------------------------------------------------------------------------|--------------------------------------------------------------------------------------------------------------------------------------------------------------------------------------------------------------------------------------------------------------------------------------------------------------------------------------------|-----------------|-----------------------------------------------------------------------------------------------------|----------------------------------------------------------------------------------------------|-----------------------------------------------------------------------------------------------------------------------------------------------------------------|--------------------------|
| Khan et<br>al. (2020)<br>[46]  | The impact of<br>COVID-19<br>pandemic on<br>mental health<br>and wellbeing<br>among home-<br>quarantined<br>Bangladeshi<br>students: A<br>cross-sectional<br>pilot study | Bangladesh | Cross-<br>sectional,<br>study via self-<br>administered<br>online survey | Stay-at-home<br>order                                                                                                  | College or University<br>student, home-<br>quarantined, able to<br>speak Bengali,<br>residing in Bangladesh<br>during the outbreak | To assess the level of<br>psychological impact<br>of college and<br>university students<br>who are bound to be<br>home-quarantined as<br>widespread<br>lockdown started                                                                                                                                                                    | <i>n</i> = 505  | 37.23% female<br>96.63%<br>unmarried;<br>78.42% aged<br>20–24 years                                 | PA/Exercise<br><br>Anxiety,<br>Depression<br>and Stress<br><br>Event<br>specific<br>distress | Individually<br>constructed<br>questionnaire<br>(Unvalidated)<br><br>Depression,<br>Anxiety and<br>Stress Scale<br><br>Impact of<br>Event Scale                 | ***                      |
| Knell et<br>al. (2020)<br>[47] | Health Behavior<br>Changes<br>During COVID-<br>19 Pandemic<br>and<br>Subsequent“<br>Stay-at-Home”<br>Orders                                                              | USA        | Cross-<br>sectional,<br>study via self-<br>administered<br>online survey | Varied<br>between<br>states—<br>included stay-<br>at-home<br>orders, social<br>distancing,<br>closure of<br>facilities | Aged >18 years,<br>currently residing in<br>USA                                                                                    | To describe how<br>positive health<br>behaviours (PA,<br>sleep) and negative<br>health behaviours<br>(alcohol, tobacco,<br>drug use) changed<br>during a 6-8 week<br>period. To<br>understand who<br>were more likely to<br>change their health<br>behaviours, and to<br>describe reported<br>reasons why<br>participants were<br>changing | <i>n</i> = 1809 | 67.4% female;<br>83.3% college<br>graduates<br>39.8% 35–49<br>years old<br>65.6% reside in<br>Texas | PA<br><br>Sleep<br>Quality<br><br>Substance<br>Use<br><br>Impact of<br>COVID-19              | IPAQ-SF<br><br>Pittsburgh<br>Sleep Quality<br>Index<br><br>Behavioural<br>Risk Factor<br>Surveillance<br>System<br><br>Individually<br>constructed<br>questions | ****                     |

**Table S1.** Study characteristics continued.

| Authors/<br>Year                | Title                                                                                                                       | Country | Study design                                                             | COVID-19<br>Restrictions                                                                                                                            | Inclusion/Exclusion<br>Criteria                                                                                  | Aim                                                                                                                                                                                                                                                                                                                                                                                                                                                    | Participants                                                                         | Pertinent<br>Participant<br>Demographics                                                                                            | Relevant<br>Outcomes      | Outcome<br>Measurement<br>Tools                                              | Overall<br>MMAT<br>Grade |
|---------------------------------|-----------------------------------------------------------------------------------------------------------------------------|---------|--------------------------------------------------------------------------|-----------------------------------------------------------------------------------------------------------------------------------------------------|------------------------------------------------------------------------------------------------------------------|--------------------------------------------------------------------------------------------------------------------------------------------------------------------------------------------------------------------------------------------------------------------------------------------------------------------------------------------------------------------------------------------------------------------------------------------------------|--------------------------------------------------------------------------------------|-------------------------------------------------------------------------------------------------------------------------------------|---------------------------|------------------------------------------------------------------------------|--------------------------|
| Lebel et<br>al. (2020)<br>[48]  | Elevated<br>depression<br>and anxiety<br>symptoms<br>among<br>pregnant<br>individuals<br>during the<br>COVID-19<br>pandemic | Canada  | Cross-<br>sectional,<br>study via self-<br>administered<br>online survey | Varied<br>between<br>states, from<br>stay-at-home<br>orders, to<br>social<br>distancing<br>with<br>variations on<br>what facilities<br>were closed  | Living in Canada, able<br>to read and write<br>English, having a<br>confirmed pregnancy<br>< 35 weeks' gestation | To determine the<br>prevalence of anxiety<br>and depression<br>symptoms in pregnant<br>people during the<br>COVID-19 pandemic<br>and identify potential<br>resilience factors<br>associated with lower<br>symptom                                                                                                                                                                                                                                      | $n = 1987$<br>Mean age =<br>32.4 years<br>( $\sigma = 4.2$ )<br>Range 18–48<br>years | 100% female<br>69% degree or<br>higher<br>Mean income \$70–<br>80,000 USD                                                           | Anxiety                   | PROMIS<br>Anxiety                                                            | ****                     |
|                                 |                                                                                                                             |         |                                                                          |                                                                                                                                                     |                                                                                                                  |                                                                                                                                                                                                                                                                                                                                                                                                                                                        |                                                                                      |                                                                                                                                     | Social<br>support         | Social support<br>effectiveness<br>questionnaire                             |                          |
|                                 |                                                                                                                             |         |                                                                          |                                                                                                                                                     |                                                                                                                  |                                                                                                                                                                                                                                                                                                                                                                                                                                                        |                                                                                      |                                                                                                                                     | PA                        | Godin PA<br>Questionnaire                                                    |                          |
| Lesser et<br>al. (2020)<br>[49] | The Impact of<br>COVID-19 on<br>Physical<br>Activity<br>Behavior and<br>Well-Being of<br>Canadians                          | Canada  | Cross-<br>sectional,<br>study via self-<br>administered<br>online survey | Varied<br>between<br>states, from<br>stay-at-home<br>orders, to<br>social<br>distancing<br>with<br>variations on<br>what facilities<br>were closed. | Aged over 19 years,<br>Canadian resident                                                                         | To gain an<br>understanding of the<br>impact of the global<br>pandemic and public<br>health restrictions on<br>Canadians. Specifically,<br>to report changes since<br>COVID-19 began on PA<br>barriers and facilitators<br>and engagement, as well<br>as well-being, in active<br>and inactive<br>individuals. To explore<br>differences in outdoor<br>PA and nature exposure<br>based on classifications<br>of generalised anxiety<br>and well-being. | $n = 1098$<br>Mean age =<br>42 years<br>( $\sigma 15$ )                              | 79.3% female<br>68.5%<br>married/domestic<br>partnership<br>33.5% degree or<br>higher<br>76.8% employed<br>45% urban<br>environment | PA                        | Godin PA<br>Questionnaire<br>and<br>Individually<br>constructed<br>questions | ****                     |
|                                 |                                                                                                                             |         |                                                                          |                                                                                                                                                     |                                                                                                                  |                                                                                                                                                                                                                                                                                                                                                                                                                                                        |                                                                                      |                                                                                                                                     | Motivation<br>to exercise | Behavioural<br>Regulations in<br>Exercise<br>Questionnaire                   |                          |
|                                 |                                                                                                                             |         |                                                                          |                                                                                                                                                     |                                                                                                                  |                                                                                                                                                                                                                                                                                                                                                                                                                                                        |                                                                                      |                                                                                                                                     | Outdoor<br>PA             | Nature<br>relatedness<br>scale                                               |                          |
|                                 |                                                                                                                             |         |                                                                          |                                                                                                                                                     |                                                                                                                  |                                                                                                                                                                                                                                                                                                                                                                                                                                                        |                                                                                      |                                                                                                                                     | Anxiety                   | GAD-7                                                                        |                          |
|                                 |                                                                                                                             |         |                                                                          |                                                                                                                                                     |                                                                                                                  |                                                                                                                                                                                                                                                                                                                                                                                                                                                        |                                                                                      |                                                                                                                                     | Well-being                | Mental Health<br>Continuum<br>(MHC-SF)                                       |                          |

Table S1. Study characteristics continued.

| Authors/<br>Year                    | Title                                                                                                                                                                        | Country | Study design                                                             | COVID-19<br>Restrictions                                                                                            | Inclusion/Exclusion<br>Criteria                                                                                                                                                                                                                           | Aim                                                                                                                                                                                                                                                                                                                                      | Participants                                                                           | Pertinent<br>Participant<br>Demographics                                                       | Relevant<br>Outcomes | Outcome<br>Measurement<br>Tools | Overall<br>MMAT<br>Grade |
|-------------------------------------|------------------------------------------------------------------------------------------------------------------------------------------------------------------------------|---------|--------------------------------------------------------------------------|---------------------------------------------------------------------------------------------------------------------|-----------------------------------------------------------------------------------------------------------------------------------------------------------------------------------------------------------------------------------------------------------|------------------------------------------------------------------------------------------------------------------------------------------------------------------------------------------------------------------------------------------------------------------------------------------------------------------------------------------|----------------------------------------------------------------------------------------|------------------------------------------------------------------------------------------------|----------------------|---------------------------------|--------------------------|
| Limbers<br>et al.<br>(2020)<br>[50] | Physical<br>activity<br>moderates the<br>association<br>between<br>parenting<br>stress and<br>quality of life<br>in working<br>mothers<br>during the<br>COVID-19<br>pandemic | USA     | Cross-<br>sectional,<br>study via self-<br>administered<br>online survey | Varied<br>between states<br>- included<br>stay-at-home<br>orders, social<br>distancing,<br>closure of<br>facilities | English speaking woman<br>from USA, aged 18 years or<br>older, at least 1 child 5<br>years old or younger living<br>with them at least 50% of<br>time; working minimum of<br>30hours/week- normally<br>outside home but now<br>working at home full time. | To 1) evaluate the<br>associations between<br>parenting stress,<br>quality of life, and<br>PA in a national<br>sample of working<br>mothers transitioned<br>to working from<br>home due to the<br>pandemic, and 2)<br>examine if PA<br>moderates the<br>association between<br>parenting stress and<br>quality of life in this<br>sample | <i>n</i> = 200<br>Mean age =<br>33.5 years<br>( $\sigma$ 6.25)<br>Range 19–60<br>years | 100% female<br>75% married<br>78% day care or<br>childcare closed<br>80.5% degree or<br>higher | PA                   | IPAQ - SF                       | ****                     |
|                                     |                                                                                                                                                                              |         |                                                                          |                                                                                                                     |                                                                                                                                                                                                                                                           |                                                                                                                                                                                                                                                                                                                                          |                                                                                        |                                                                                                | QoL                  | WHOQOL -<br>BREF                |                          |
|                                     |                                                                                                                                                                              |         |                                                                          |                                                                                                                     |                                                                                                                                                                                                                                                           |                                                                                                                                                                                                                                                                                                                                          |                                                                                        |                                                                                                | Parenting<br>Stress  | Parental Stress<br>Scale        |                          |

Table S1. Study characteristics continued.

| Authors/<br>Year                                                    | Title                                                                                                                                                                                                       | Country | Study design                                                             | COVID-19<br>Restrictions                                        | Inclusion/Exclusion<br>Criteria | Aim                                                                                                                                                                                                                                                                                          | Participants                                                 | Pertinent<br>Participant<br>Demographics                                                                                          | Relevant<br>Outcomes | Outcome<br>Measurement<br>Tools                                          | Overall<br>MMAT<br>Grade |
|---------------------------------------------------------------------|-------------------------------------------------------------------------------------------------------------------------------------------------------------------------------------------------------------|---------|--------------------------------------------------------------------------|-----------------------------------------------------------------|---------------------------------|----------------------------------------------------------------------------------------------------------------------------------------------------------------------------------------------------------------------------------------------------------------------------------------------|--------------------------------------------------------------|-----------------------------------------------------------------------------------------------------------------------------------|----------------------|--------------------------------------------------------------------------|--------------------------|
| Lin et al.<br>(2020)<br>[51]                                        | Depression is<br>Associated with<br>Moderate-<br>Intensity Physical<br>Activity Among<br>College Students<br>During the<br>COVID-19<br>Pandemic: Differs<br>by Activity Level,<br>Gender and<br>Gender Role | China   | Cross-<br>sectional,<br>study via self-<br>administered<br>online survey | Lockdown<br>policies<br>implemented<br>in almost all<br>regions | Chinese college<br>student      | To investigate<br>associations between<br>depression and PA<br>among Chinese college<br>students and to examine<br>the effect of gender and<br>gender role on such<br>relationships during the<br>COVID-19 pandemic                                                                          | $n = 625$<br>Mean age<br>= 20.18<br>years<br>(no $\sigma$ )  | 64.8% female                                                                                                                      | PA                   | IPAQ-SF                                                                  | ****                     |
|                                                                     |                                                                                                                                                                                                             |         |                                                                          |                                                                 |                                 |                                                                                                                                                                                                                                                                                              |                                                              |                                                                                                                                   | Sedentary<br>time    | IPAQ -SF                                                                 |                          |
|                                                                     |                                                                                                                                                                                                             |         |                                                                          |                                                                 |                                 |                                                                                                                                                                                                                                                                                              |                                                              |                                                                                                                                   | Depression           | Center for<br>Epidemiological<br>Studies<br>Depression<br>Scales (CES-D) |                          |
|                                                                     |                                                                                                                                                                                                             |         |                                                                          |                                                                 |                                 |                                                                                                                                                                                                                                                                                              |                                                              |                                                                                                                                   | Gender<br>Role       | Chinese Sex-Role<br>Inventory                                            |                          |
| Lopez-<br>Bueno,<br>Calatayud,<br>Andersen et<br>al. (2020)<br>[52] | Immediate<br>Impact of the<br>COVID-19<br>Confinement on<br>Physical Activity<br>Levels in Spanish<br>Adults                                                                                                | Spain   | Cross-<br>sectional,<br>study via self-<br>administered<br>online survey | Stay-at-home<br>order                                           | Spanish adults                  | To quantify the change in<br>PA of the Spanish adult<br>population during<br>COVID-19 confinement<br>compared with before<br>confinement.<br>Quantification of this<br>change is important to<br>provide practical<br>recommendations, e.g.,<br>on physical activities to<br>perform at home | $n = 2042$<br>Mean age<br>35.9%<br>years<br>( $\sigma$ 13.6) | 54% female<br>49% married<br>63%<br>university<br>degree<br>Mean PA =<br>221.9<br>mins/week<br>( $\sigma$ 193.6) pre-<br>COVID-19 | PA                   | Physical activity<br>vital sign (PAVS)<br>short form                     | ****                     |

**Table S1.** Study characteristics continued.

| Authors/ Year                                       | Title                                                                                                                                              | Country              | Study design                                                           | COVID-19 Restrictions | Inclusion/Exclusion Criteria     | Aim                                                                                                                                                                                                                                                                                                      | Participants                                                             | Pertinent Participant Demographics                             | Relevant Outcomes                                                           | Outcome Measurement Tools                                                                                                         | Overall MMAT Grade |
|-----------------------------------------------------|----------------------------------------------------------------------------------------------------------------------------------------------------|----------------------|------------------------------------------------------------------------|-----------------------|----------------------------------|----------------------------------------------------------------------------------------------------------------------------------------------------------------------------------------------------------------------------------------------------------------------------------------------------------|--------------------------------------------------------------------------|----------------------------------------------------------------|-----------------------------------------------------------------------------|-----------------------------------------------------------------------------------------------------------------------------------|--------------------|
| Lopez-Bueno, Calatayud, Ezzatvar et al. (2020) [53] | Association Between Current Physical Activity and Current Perceived Anxiety and Mood in the Initial Phase of COVID-19 Confinement                  | Spain                | Cross-sectional, study via self-administered online survey             | Stay-at-home order    | Spanish adults                   | The main objective of this study was to evaluate the association between current PA and current perceived both anxiety and mood among Spanish adults confined due to COVID-19                                                                                                                            | $n = 2250$<br>Mean age 35.3 years (SD 13.6)                              | 54.8% female<br>38.9% meeting WHO guidelines prior to COVID-19 | PA<br>Perceived anxiety<br>Perceived mood                                   | Physical activity vital sign (PAVS) - SF<br>Individually constructed questions<br>Individually constructed questions              | ****               |
| Luciano et al. (2020) [54]                          | COVID-19 lockdown: Physical activity, sedentary behaviour and sleep in Italian medicine students                                                   | Italy                | Cross-Sectional longitudinal study via self-administered online survey | Stay-at-home order    | 1st to 6th year medical students | To describe PA, sedentary behaviour and sleep of Italian medicine students during COVID-19 lockdown                                                                                                                                                                                                      | $n = 1470$<br>Mean age = 23 years ( $\sigma 2$ )                         | 70% female                                                     | PA<br>Sitting time<br>Sleep Quality                                         | IPAQ-SF<br>IPAQ-SF<br>Pittsburgh Sleep Quality Index                                                                              | ****               |
| Maier et al. (2021) [55]                            | Physical activity is positively associated with college students' positive affect regardless of stressful life events during the COVID-19 pandemic | USA (North Carolina) | Longitudinal study via self-administered online survey                 | Stay-at-home order    | College students                 | To determine associations between PA and affect among college students before and during COVID-19 stay-at-home orders and how change in PA predicts change in affect during this time. To determine whether stressful life events during stay-at-home orders moderated association between PA and affect | $n = 107$<br>Mean age = 21.7 years ( $\sigma 2.6$ )<br>Range 18–34 years | 71.3% female<br>54% white                                      | Affect<br>PA<br>Sleep Quality<br>Stressful life events<br>Mental Well-being | Positive and Negative Affect Schedule<br>IPAQ - SF<br>Pittsburgh Sleep Quality Index<br>Social Re-adjustment Rating Scale<br>HADS | **                 |

Table S1. Study characteristics continued.

| Authors/<br>Year                     | Title                                                                                       | Country | Study Design                                               | COVID-19<br>Restrictions                 | Inclusion/Exclusion<br>Criteria                                                                                                                 | Aim                                                                                                                                                                                                                                                                                                  | Participants                                                                                                     | Pertinent<br>Participant<br>Demographics                                                                                                                                  | Relevant<br>Outcomes                                                                          | Outcome<br>Measurement<br>Tools                                                                                                                           | Overall<br>MMAT<br>Grade |
|--------------------------------------|---------------------------------------------------------------------------------------------|---------|------------------------------------------------------------|------------------------------------------|-------------------------------------------------------------------------------------------------------------------------------------------------|------------------------------------------------------------------------------------------------------------------------------------------------------------------------------------------------------------------------------------------------------------------------------------------------------|------------------------------------------------------------------------------------------------------------------|---------------------------------------------------------------------------------------------------------------------------------------------------------------------------|-----------------------------------------------------------------------------------------------|-----------------------------------------------------------------------------------------------------------------------------------------------------------|--------------------------|
| Martinez<br>et al.<br>(2020)<br>[56] | Physical activity in periods of social distancing due to COVID-19: a cross-sectional survey | Brazil  | Cross-sectional, study via self-administered online survey | Social distancing and stay-at-home order | 18 years or older: ability to understand Portuguese, born/currently live in Brazil; practised physical exercise until pre-COVID-19 restrictions | To assess the changes in the habits of the Brazilian population engaged in PA in relation to their practices, due the measures of social distancing. As a secondary objective, we sought to describe the levels of anxiety and depression of this population, during the period of social distancing | $n = 1613$<br>Mean age females = 35.4 years ( $\sigma = 12$ )<br>Mean age males = 36.2 years ( $\sigma = 10.9$ ) | 63.1% female;<br>75.3% Higher education<br>86.9% cohabiting;<br>44.5% married;<br>81% good self-perception of health<br>45.7% active 5 or more days per week pre-COVID-19 | PA                                                                                            | Individually constructed questionnaire (Unvalidated)                                                                                                      | **                       |
| Maugeri<br>et al.<br>(2020)<br>[57]  | The impact of physical activity on psychological health during Covid-19 pandemic in Italy   | Italy   | Cross-sectional, study via self-administered online survey | Stay-at-home order                       | No details                                                                                                                                      | To examine (1) changes in the PA levels during self-quarantine in Italy; (2) the correlation between PA and well-being of individuals                                                                                                                                                                | $n = 2524$                                                                                                       | 56.4% female. Split into 4 age groups<br>Aged <21 ( $n = 346$ ); young adult aged 21–40 ( $n = 1178$ ); adults aged 41–60 ( $n = 1704$ ) and over 60 age ( $n = 296$ )    | PA<br>Psychological and general well-being<br>Motivation to exercise<br>Anxiety<br>Well-being | IPAQ - SF<br>Psychological and General Well Being Index<br>Behavioural Regulations in Exercise Questionnaire<br>GAD-7<br>Mental Health Continuum (MHC-SF) | **                       |



Table S1. Study characteristics continued.

| Authors/<br>Year                  | Title                                                                                                                                           | Country       | Study Design                                                                                        | COVID-19<br>Restrictions                                          | Inclusion/Exclusion<br>Criteria      | Aim                                                                                                                                                                                                                                                                                         | Participants    | Pertinent<br>Participant<br>Demographics                                                                                         | Relevant<br>Outcomes | Outcome<br>Measurement<br>Tools                            | Overall<br>MMAT<br>Grade |
|-----------------------------------|-------------------------------------------------------------------------------------------------------------------------------------------------|---------------|-----------------------------------------------------------------------------------------------------|-------------------------------------------------------------------|--------------------------------------|---------------------------------------------------------------------------------------------------------------------------------------------------------------------------------------------------------------------------------------------------------------------------------------------|-----------------|----------------------------------------------------------------------------------------------------------------------------------|----------------------|------------------------------------------------------------|--------------------------|
|                                   |                                                                                                                                                 |               |                                                                                                     |                                                                   |                                      |                                                                                                                                                                                                                                                                                             |                 |                                                                                                                                  | PA                   | IPAQ                                                       |                          |
| McDowell<br>et al.<br>(2020) [58] | Working from<br>Home and Job<br>Loss Due to<br>the COVID-19<br>Pandemic Are<br>Associated<br>With Greater<br>Time in<br>Sedentary<br>Behaviours | USA<br>(Iowa) | Cross Sectional<br>survey - via<br>self-<br>administered<br>online survey<br>(purposeful<br>sample) | Social<br>distancing/self-<br>quarantine/closure<br>of facilities | Adult, employed<br>prior to COVID-19 | To explore whether<br>COVID-19-related<br>employment<br>changes were<br>associated with<br>activity behaviours,<br>including sitting<br>time, screen time,<br>and PA, in a sample<br>of 2,303 previously<br>employed USA<br>adult participants<br>in the COVID-19<br>and Wellbeing<br>Study | <i>n</i> = 2303 | 66% female<br>Data split<br>between groups<br>for different<br>work patterns no<br>overall<br>summary.<br>Primarily<br>Caucasian | Sitting<br>time      | Unclear —<br>inferred<br>probable<br>question from<br>IPAQ | ***                      |

Table S1. Study characteristics continued.

| Authors/<br>Year               | Title                                                                                                                                                              | Country       | Study Design                                                             | COVID-19<br>Restrictions                                          | Inclusion/Exclusion<br>Criteria            | Aim                                                                                                                                                             | Participants | Pertinent<br>Participant<br>Demographics                               | Relevant<br>Outcomes                  | Outcome<br>Measurement<br>Tools                                                                                                                                                                                                 | Overall<br>MMAT<br>Grade |
|--------------------------------|--------------------------------------------------------------------------------------------------------------------------------------------------------------------|---------------|--------------------------------------------------------------------------|-------------------------------------------------------------------|--------------------------------------------|-----------------------------------------------------------------------------------------------------------------------------------------------------------------|--------------|------------------------------------------------------------------------|---------------------------------------|---------------------------------------------------------------------------------------------------------------------------------------------------------------------------------------------------------------------------------|--------------------------|
| Meyer et<br>al. (2020)<br>[59] | Changes in<br>Physical Activity<br>and Sedentary<br>Behavior in<br>Response to<br>COVID-19 and<br>Their<br>Associations with<br>Mental Health in<br>3052 US Adults | USA<br>(Iowa) | Cross-<br>sectional,<br>study via self-<br>administered<br>online survey | Social<br>distancing/self-<br>quarantine/closure<br>of facilities | Aged ≥18 years;<br>current USA<br>resident | To evaluate the<br>impact of<br>COVID-19-related<br>public health<br>guidelines on PA,<br>sedentary<br>behaviour, mental<br>health, and their<br>interrelations | $n = 3052$   | 62% female;<br>93.1%<br>Caucasian;<br>67.6% married<br>or relationship | Mental<br>Health                      | Perceived<br>Stress Scale-4<br>Loneliness<br>scale<br>The Short<br>Warwick-<br>Edinburgh<br>Mental Well-<br>being Scale<br>Lubben Social<br>Network Scale-<br>6<br>Beck<br>Depression<br>Inventory<br>Beck Anxiety<br>Inventory | **                       |
|                                |                                                                                                                                                                    |               |                                                                          |                                                                   |                                            |                                                                                                                                                                 |              |                                                                        | PA                                    | Individually<br>constructed<br>question<br>(unclear if<br>validated)                                                                                                                                                            |                          |
|                                |                                                                                                                                                                    |               |                                                                          |                                                                   |                                            |                                                                                                                                                                 |              |                                                                        | Sitting<br>time and<br>screen<br>time | Individually<br>constructed<br>question<br>(unclear if<br>validated)                                                                                                                                                            |                          |

Table S1. Study characteristics continued.

| Authors/<br>Year                                        | Title                                                                                                                                                                                                   | Country | Study Design                                                             | COVID-19<br>Restrictions                                                                                                                           | Inclusion/Exclusion<br>Criteria                                                                                                       | Aim                                                                                                                                                                                                                                                                                                                                                     | Participants                                              | Pertinent<br>Participant<br>Demographics                                                                                                                                           | Relevant<br>Outcomes                                             | Outcome<br>Measurement<br>Tools                                                                                                                                         | Overall<br>MMAT<br>Grade |
|---------------------------------------------------------|---------------------------------------------------------------------------------------------------------------------------------------------------------------------------------------------------------|---------|--------------------------------------------------------------------------|----------------------------------------------------------------------------------------------------------------------------------------------------|---------------------------------------------------------------------------------------------------------------------------------------|---------------------------------------------------------------------------------------------------------------------------------------------------------------------------------------------------------------------------------------------------------------------------------------------------------------------------------------------------------|-----------------------------------------------------------|------------------------------------------------------------------------------------------------------------------------------------------------------------------------------------|------------------------------------------------------------------|-------------------------------------------------------------------------------------------------------------------------------------------------------------------------|--------------------------|
| Munekawa<br>et al. (2020)<br>[60]                       | Effect of<br>coronavirus<br>disease 2019<br>pandemic on<br>the lifestyle<br>and glycaemic<br>control in<br>patients with<br>type 2 diabetes:<br>a cross-section<br>and<br>retrospective<br>cohort study | Japan   | Cross-<br>sectional,<br>study via self-<br>administered<br>online survey | Stay-at-home<br>order                                                                                                                              | Included - Type 2<br>Diabetes Mellitus.<br>Excluded - hospital<br>admission or changed<br>diabetes medication<br>during past 3 months | To investigate the<br>acute effects of the<br>COVID-19<br>pandemic on the<br>lifestyle changes in<br>patients with type 2<br>diabetes mellitus.<br>Furthermore, we<br>also investigated the<br>association between<br>these changes and<br>metabolic<br>parameters,<br>including body<br>weight and<br>haemoglobin A1c<br>levels.                       | $n = 183$<br>Mean age =<br>67.4 years<br>( $\sigma$ 11.3) | 62.1% male                                                                                                                                                                         | Stress and<br>lifestyle<br>factors<br>(including<br>exercise/PA) | Visual<br>analogue scale<br>(0 =<br>considerably<br>reduced, 5 = no<br>change, and 10<br>= considerably<br>increased)                                                   | **                       |
| Nienhuis et<br>al. (2020) -<br>linked to<br>Lesser [61] | The Impact of<br>COVID-19 on<br>Women's<br>Physical<br>Activity<br>Behavior and<br>Mental Well-<br>Being                                                                                                | Canada  | Cross-<br>sectional,<br>study via self-<br>administered<br>online survey | Varied<br>between<br>states, from<br>stay-at-home<br>orders, to<br>social<br>distancing<br>with<br>variations on<br>what facilities<br>were closed | Aged 19 years or over                                                                                                                 | To assess whether<br>sex differences exist<br>in PA and well-<br>being since COVID-<br>19 and to explore<br>how barriers or<br>facilitators to PA<br>may explain these<br>differences. To look<br>at whether changes<br>in occupation or<br>childcare<br>responsibilities since<br>COVID-19 have<br>impacted women's<br>well-being and PA<br>engagement | $n = 1086$                                                | 80.1% female,<br>mean age = 41 ( $\sigma$<br>15); 215 males,<br>mean age = 45 ( $\sigma$<br>16). Greater % of<br>women higher<br>educated greater<br>% of men in full<br>time work | PA<br>Motivation<br>to exercise<br>Anxiety<br>Well-being         | Godin PA<br>Questionnaire<br>+ additional<br>questions<br>Behavioural<br>Regulations in<br>Exercise<br>Questionnaire<br>GAD-7<br>Mental Health<br>Continuum<br>(MHC-SF) | ***                      |

Table S1. Study characteristics continued.

| Authors/<br>Year                                         | Title                                                                                                                           | Country   | Study Design                                                            | COVID-19<br>Restrictions | Inclusion/Exclusion<br>Criteria                                       | Aim                                                                                                                                                                                                                                                                                                     | Participants                                                       | Pertinent<br>Participant<br>Demographics                         | Relevant<br>Outcomes                                | Outcome<br>Measurement<br>Tools                                                   | Overall<br>MMAT<br>Grade |
|----------------------------------------------------------|---------------------------------------------------------------------------------------------------------------------------------|-----------|-------------------------------------------------------------------------|--------------------------|-----------------------------------------------------------------------|---------------------------------------------------------------------------------------------------------------------------------------------------------------------------------------------------------------------------------------------------------------------------------------------------------|--------------------------------------------------------------------|------------------------------------------------------------------|-----------------------------------------------------|-----------------------------------------------------------------------------------|--------------------------|
| Oliva et al. (2020) (look at for qual data display) [62] | Puppy love in the time of Corona: Dog ownership protects against loneliness for those living alone during the COVID-19 lockdown | Australia | Mixed methods cross-sectional study via self-administered online survey | Stay-at-home order       | Aged 18 years or older, Australian citizens, living alone             | To capture the experience of the COVID-19 lockdown in an Australian population living alone. Specifically, to investigate whether pet owners living alone demonstrate higher levels of mindfulness as compared to non-owners living alone while adjusting for previous mindfulness training experiences | $n = 384$<br>Mean age = 50.92 years ( $\sigma$ 15.09 years)        | 85.4% female; 69% degree education or higher; 66% self-isolating | Impact of having a pet on COVID 19 experience       | Two open ended questions                                                          | *****                    |
| Ozdemir et al. (2020) [63]                               | The role of physical activity on mental health and quality of life during COVID-19 outbreak: A cross-sectional study            | Turkey    | Cross-sectional, study via self-administered online survey              | Stay-at-home order       | Included - No details. Excluded -psychiatric or neurological diseases | To evaluate the PA levels of individuals and assess the effects of PA on quality of life, depression and anxiety levels during COVID-19 outbreak.                                                                                                                                                       | $n = 2301$<br>Mean age =36.2 ( $\sigma$ 10.9)<br>Range 20–75 years | 61.1% female; 61% aged 20-39; 59.6% married; 72.5% employed      | PA<br>Depression<br>Anxiety<br>QoL<br>Active breaks | IPAQ - SF<br>Beck Depression Inventory<br>Beck Anxiety Inventory<br>WHOQOL - BREF | ***                      |

Table S1. Study characteristics continued.

| Authors/<br>Year                | Title                                                                                                                                     | Country    | Study Design                                               | COVID-19<br>Restrictions                              | Inclusion/Exclusion<br>Criteria                                     | Aim                                                                                                                                                                                      | Participants                                                                  | Pertinent<br>Participant<br>Demographics            | Relevant<br>Outcomes                    | Outcome<br>Measurement<br>Tools                                                                                                      | Overall<br>MMAT<br>Grade |
|---------------------------------|-------------------------------------------------------------------------------------------------------------------------------------------|------------|------------------------------------------------------------|-------------------------------------------------------|---------------------------------------------------------------------|------------------------------------------------------------------------------------------------------------------------------------------------------------------------------------------|-------------------------------------------------------------------------------|-----------------------------------------------------|-----------------------------------------|--------------------------------------------------------------------------------------------------------------------------------------|--------------------------|
| Pieh et al.<br>(2020)<br>[64]   | The effect of age, gender, income, work, and physical activity on mental health during coronavirus disease (COVID-19) lockdown in Austria | Austria    | Cross-sectional, study via self-administered online survey | Stay-at-home order, exercise outdoors alone permitted | General population                                                  | To evaluate mental health in a representative adult sample in Austria after 4 weeks of lockdown considering relevant influencing factors such as age, gender, income, and job situation. | <i>n</i> = 1005                                                               | 52.7% female; 36.7% university educated             | PA<br><br><br><br><br><br>Mental Health | Individual question (Unvalidated)<br><br>WHOQOL-BREF<br>WHO-5 well-being<br>Perceived Stress (PSS-10)<br>Depression (PHQ-9)<br>GAD-7 | ***                      |
| Rahman et al.<br>(2020)<br>[65] | Physical inactivity and sedentary behaviours in the Bangladeshi population during the COVID-19 pandemic: An online cross-sectional survey | Bangladesh | Cross-sectional, study via self-administered online survey | Stay-at-home order                                    | Bangladeshi residence, Aged 18 years or older, able to read Bangla. | To determine the prevalence of physical inactivity and sedentary behaviours during the COVID-19 pandemic among Bangladeshi people.                                                       | <i>n</i> = 2038<br>Mean age = 25.9 years ( $\sigma$ 8.1)<br>Range 18–65 years | 42.8% female<br>71% single<br>64.4% degree or above | PA<br><br><br><br><br>Sitting time      | IPAQ - SF<br><br><br><br><br>IPAQ - SF                                                                                               | ***                      |

**Table S1.** Study characteristics continued.

| Authors/<br>Year | Title | Country | Study Design | COVID-19<br>Restrictions | Inclusion/Exclusion<br>Criteria | Aim | Participants | Pertinent<br>Participant<br>Demographics | Relevant<br>Outcomes | Outcome<br>Measurement<br>Tools | Overall<br>MMAT<br>Grade |
|------------------|-------|---------|--------------|--------------------------|---------------------------------|-----|--------------|------------------------------------------|----------------------|---------------------------------|--------------------------|
|------------------|-------|---------|--------------|--------------------------|---------------------------------|-----|--------------|------------------------------------------|----------------------|---------------------------------|--------------------------|

PA

Table S1. Study characteristics continued.

| Authors/<br>Year                   | Title                                                                                                                                  | Country | Study Design                                                             | COVID-19<br>Restrictions                                                                                                                            | Inclusion/Exclusion<br>Criteria               | Aim                                                                                                                                                                                                                                                                                                                                                                                                                                                                                                                       | Participants                                           | Pertinent<br>Participant<br>Demographics                                                                                                                                                                                      | Relevant<br>Outcomes                                       | Outcome<br>Measurement<br>Tools                                                                              | Overall<br>MMAT<br>Grade |
|------------------------------------|----------------------------------------------------------------------------------------------------------------------------------------|---------|--------------------------------------------------------------------------|-----------------------------------------------------------------------------------------------------------------------------------------------------|-----------------------------------------------|---------------------------------------------------------------------------------------------------------------------------------------------------------------------------------------------------------------------------------------------------------------------------------------------------------------------------------------------------------------------------------------------------------------------------------------------------------------------------------------------------------------------------|--------------------------------------------------------|-------------------------------------------------------------------------------------------------------------------------------------------------------------------------------------------------------------------------------|------------------------------------------------------------|--------------------------------------------------------------------------------------------------------------|--------------------------|
| Rhodes<br>et al.<br>(2020)<br>[67] | Correlates of<br>Perceived<br>Physical<br>Activity<br>Transitions<br>during the<br>COVID-19<br>Pandemic<br>among<br>Canadian<br>Adults | Canada  | Cross-<br>sectional,<br>study via self-<br>administered<br>online survey | Varied<br>between<br>states, from<br>stay-at-home<br>orders, to<br>social<br>distancing<br>with<br>variations on<br>what facilities<br>were closed. | English speaking;<br>aged 18 years or<br>over | To (1) replicate the<br>change in MVPA<br>findings from China,<br>Europe, and the<br>United States, within<br>a Canadian sample,<br>(2) explore correlates<br>of current MVPA<br>and shifts in MVPA<br>after the COVID-19<br>restrictions had been<br>in place for nearly<br>two months, and (3)<br>predict the stability<br>of the MVPA<br>profiles (e.g.,<br>inactive throughout,<br>active throughout,<br>those who were<br>active but became<br>inactive) as a result<br>of the COVID-19<br>pandemic<br>restrictions. | $n = 1055$<br>Mean age =<br>48.82<br>( $\sigma$ 16.66) | 51% female<br>83% white;<br>29% responsible<br>for children;<br>48.9% degree or<br>higher<br>48.2% full time<br>employment;<br>28.1% dog<br>owner Mean PA<br>= 201.38 ( $\sigma$<br>223.76) mins per<br>week pre-<br>COVID-19 | PA                                                         | Godin PA<br>Questionnaire                                                                                    | ****                     |
|                                    |                                                                                                                                        |         |                                                                          |                                                                                                                                                     |                                               |                                                                                                                                                                                                                                                                                                                                                                                                                                                                                                                           |                                                        |                                                                                                                                                                                                                               | Psychological<br>factors /<br>personality trait<br>factors | NEO 5 factor<br>Inventory;<br>Neuroticism<br>scale; Executive<br>Function Index<br>sub-scale.                |                          |
|                                    |                                                                                                                                        |         |                                                                          |                                                                                                                                                     |                                               |                                                                                                                                                                                                                                                                                                                                                                                                                                                                                                                           |                                                        |                                                                                                                                                                                                                               | Social factors                                             | Study created<br>items                                                                                       |                          |
|                                    |                                                                                                                                        |         |                                                                          |                                                                                                                                                     |                                               |                                                                                                                                                                                                                                                                                                                                                                                                                                                                                                                           |                                                        |                                                                                                                                                                                                                               | Home<br>environment                                        | Based on home<br>exercise<br>environment<br>affordances<br>measure (Sallis et<br>al.1997)                    |                          |
|                                    |                                                                                                                                        |         |                                                                          |                                                                                                                                                     |                                               |                                                                                                                                                                                                                                                                                                                                                                                                                                                                                                                           |                                                        |                                                                                                                                                                                                                               | Neighbourhood<br>environment                               | Neighbourhood<br>walkability scale<br>International PA<br>Prevalence Study<br>Environmental<br>Survey Module |                          |

Table S1. Study characteristics continued.

| Authors/<br>Year                    | Title                                                                                                                                                                                                              | Country | Study Design                                                                                                               | COVID-19<br>Restrictions                              | Inclusion/Exclusion<br>Criteria                                                                                        | Aim                                                                                                                                                                                                                                                                                                                             | Participants                                                 | Pertinent<br>Participant<br>Demographics                                                                         | Relevant<br>Outcomes                           | Outcome<br>Measurement<br>Tools                       | Overall<br>MMAT<br>Grade |
|-------------------------------------|--------------------------------------------------------------------------------------------------------------------------------------------------------------------------------------------------------------------|---------|----------------------------------------------------------------------------------------------------------------------------|-------------------------------------------------------|------------------------------------------------------------------------------------------------------------------------|---------------------------------------------------------------------------------------------------------------------------------------------------------------------------------------------------------------------------------------------------------------------------------------------------------------------------------|--------------------------------------------------------------|------------------------------------------------------------------------------------------------------------------|------------------------------------------------|-------------------------------------------------------|--------------------------|
| Richardson<br>et al. (2020)<br>[68] | The influence of<br>COVID-19<br>measures in the<br>United Kingdom<br>on physical<br>activity levels,<br>perceived<br>physical function<br>and mood in<br>older adults: A<br>survey-based<br>observational<br>study | UK      | Cross-sectional,<br>convergent<br>mixed-<br>methods,<br>observational<br>Survey via self-<br>administered<br>online survey | Stay-at-<br>home, once a<br>day exercise<br>permitted | At least 70 years old,<br>living in the UK,<br>absent of any<br>cognitive disorders,<br>with access to the<br>internet | To examine the<br>impact that COVID-<br>19 measures in the<br>UK, had on<br>individuals aged 70<br>and over in terms of<br>their PA levels,<br>perceived physical<br>functioning, and<br>mood                                                                                                                                   | $n = 117$<br>Mean age =<br>75 years<br>( $\sigma 4$ )        | 55.6% females<br>All Caucasian<br>$n = 82$ married<br>or cohabiting<br>Higher than<br>average activity<br>levels | PA<br>Sitting time                             | IPAQ-Elderly                                          | ***                      |
|                                     |                                                                                                                                                                                                                    |         |                                                                                                                            |                                                       |                                                                                                                        |                                                                                                                                                                                                                                                                                                                                 |                                                              |                                                                                                                  | Perception<br>of function<br>and<br>disability | Late-life<br>Function and<br>Disability<br>Instrument |                          |
|                                     |                                                                                                                                                                                                                    |         |                                                                                                                            |                                                       |                                                                                                                        |                                                                                                                                                                                                                                                                                                                                 |                                                              |                                                                                                                  | Mood                                           | Brunel Mood<br>Scale<br>(BRUMS)                       |                          |
| Robinson et<br>al. (2021)<br>[69]   | Obesity, eating<br>behavior and<br>physical activity<br>during COVID-19<br>lockdown: A<br>study of UK<br>adults                                                                                                    | UK      | Cross-sectional,<br>study via self-<br>administered<br>online survey                                                       | Stay-at-<br>home, once a<br>day exercise<br>permitted | Aged 18 years or over,<br>fluent English, UK<br>resident                                                               | To examine<br>perceived changes<br>(before vs. during<br>social lockdown) to<br>a range of weight-<br>related behaviours<br>in a large sample of<br>UK adults during<br>social lockdown, as<br>well as to examine<br>whether there have<br>been common<br>barriers to weight<br>management<br>because of the<br>COVID-19 crisis | $n = 2002$<br>Mean age =<br>34.74 years<br>( $\sigma 12.3$ ) | 61.7% female;<br>65.5% degree<br>level education;<br>89.7% white                                                 | Perceived<br>behaviour<br>changes              | Individually<br>constructed<br>questions              | ****                     |
|                                     |                                                                                                                                                                                                                    |         |                                                                                                                            |                                                       |                                                                                                                        |                                                                                                                                                                                                                                                                                                                                 |                                                              |                                                                                                                  | PA                                             | IPAQ                                                  |                          |
|                                     |                                                                                                                                                                                                                    |         |                                                                                                                            |                                                       |                                                                                                                        |                                                                                                                                                                                                                                                                                                                                 |                                                              |                                                                                                                  | Diet quality                                   | Food<br>frequency<br>questionnaire                    |                          |
|                                     |                                                                                                                                                                                                                    |         |                                                                                                                            |                                                       |                                                                                                                        |                                                                                                                                                                                                                                                                                                                                 |                                                              |                                                                                                                  | Overeating                                     | Addiction-<br>Like Eating<br>Behavior Scale           |                          |
|                                     |                                                                                                                                                                                                                    |         |                                                                                                                            |                                                       |                                                                                                                        |                                                                                                                                                                                                                                                                                                                                 |                                                              |                                                                                                                  | Well-being                                     | WHO-5 well-<br>being                                  |                          |



Table S1. Study characteristics continued.

| Authors/<br>Year                  | Title                                                                                                                                                                                                                                | Country | Study Design                                                                                          | COVID-19<br>Restrictions                                 | Inclusion/Exclusion<br>Criteria              | Aim                                                                                                                                                                                                                               | Participants                                                                        | Pertinent<br>Participant<br>Demographics                                                    | Relevant<br>Outcomes           | Outcome<br>Measurement<br>Tools                                                                                                                             | Overall<br>MMAT<br>Grade |
|-----------------------------------|--------------------------------------------------------------------------------------------------------------------------------------------------------------------------------------------------------------------------------------|---------|-------------------------------------------------------------------------------------------------------|----------------------------------------------------------|----------------------------------------------|-----------------------------------------------------------------------------------------------------------------------------------------------------------------------------------------------------------------------------------|-------------------------------------------------------------------------------------|---------------------------------------------------------------------------------------------|--------------------------------|-------------------------------------------------------------------------------------------------------------------------------------------------------------|--------------------------|
| Rogers et<br>al. (2020)<br>[70]   | Behavioral Change<br>Towards Reduced<br>Intensity Physical<br>Activity Is<br>Disproportionately<br>Prevalent Among<br>Adults With Serious<br>Health Issues or Self-<br>Perception of High<br>Risk During the UK<br>COVID-19 Lockdown | UK      | Cross-<br>sectional<br>convergent<br>mixed method<br>study via self-<br>administered<br>online survey | Stay-at-<br>home, once<br>a day<br>exercise<br>permitted | Aged 13 years or<br>over, living in UK       | To identify whether<br>the UK's lockdown<br>measures have had<br>disproportionate<br>impacts on PA<br>intensity in groups<br>who are, or who<br>perceive themselves<br>to be at risk of worse<br>outcomes of COVID-<br>19 disease | $n = 9190$<br>Range 20–<br>70+ years                                                | 77.7% female<br>82% aged 35–69<br>62% educated<br>to degree level<br>or higher<br>95% white | PA<br>Disability<br>Depression | Individually<br>constructed<br>questionnaire<br>(Validated)<br>Individually<br>constructed<br>questionnaire<br>Individually<br>constructed<br>questionnaire | ***                      |
| Rogowska<br>et al.<br>(2020) [71] | Does Physical Activity<br>Matter for the Mental<br>Health of University<br>Students during the<br>COVID-19 Pandemic?                                                                                                                 | Ukraine | Cross-sectional,<br>study via self-<br>administered<br>online survey                                  | Stay-at-home-<br>order and<br>social<br>distancing       | Ukrainian student at 1<br>of 18 universities | To examine the<br>prevalence of anxiety<br>and depression<br>disorders during the<br>pandemic in a sample<br>of university students<br>in Ukraine.                                                                                | $n = 1512$<br>Mean age =<br>20.06 years<br>( $\sigma$ 3.05)<br>Range 18-51<br>years | 68.65% female;<br>32.67% rural<br>46.49% meeting<br>PA guidelines<br>pre-COVID-19           | PA<br>Anxiety                  | Individually<br>constructed<br>questionnaire<br>(Unvalidated)<br>GAD-7                                                                                      | **                       |

**Table S1.** Study characteristics continued.

| Authors/<br>Year                           | Title                                                                                                                                                      | Country | Study Design                                                             | COVID-19<br>Restrictions | Inclusion/Exclusion<br>Criteria                                                                                 | Aim                                                                                                                                                                                                                                                                                                                                                                                                              | Participants                                             | Pertinent<br>Participant<br>Demographics                                                                                                                                               | Relevant<br>Outcomes                                                                                                                      | Outcome<br>Measurement<br>Tools                                                                                                                   | Overall<br>MMAT<br>Grade |
|--------------------------------------------|------------------------------------------------------------------------------------------------------------------------------------------------------------|---------|--------------------------------------------------------------------------|--------------------------|-----------------------------------------------------------------------------------------------------------------|------------------------------------------------------------------------------------------------------------------------------------------------------------------------------------------------------------------------------------------------------------------------------------------------------------------------------------------------------------------------------------------------------------------|----------------------------------------------------------|----------------------------------------------------------------------------------------------------------------------------------------------------------------------------------------|-------------------------------------------------------------------------------------------------------------------------------------------|---------------------------------------------------------------------------------------------------------------------------------------------------|--------------------------|
| Romero-<br>Blanco et<br>al. (2020)<br>[72] | Physical<br>Activity and<br>Sedentary<br>Lifestyle in<br>University<br>Students:<br>Changes<br>during<br>Confinement<br>Due to the<br>COVID-19<br>Pandemic | Spain   | Longitudinal<br>study via self-<br>administered<br>online survey         | Stay-at-<br>home order   | 1st-4th year Health<br>Science University<br>Student                                                            | To evaluate students' PA<br>and sedentary behaviour<br>at two points in time:<br>before and during the<br>coronavirus lockdown.<br>Also, to look at changes<br>in PA and sedentary<br>behaviour resulting from<br>other factors such as<br>alcohol and tobacco<br>consumption, adherence<br>to a Mediterranean diet,<br>motivation, symptoms of<br>anxiety/depression and<br>sociodemographic<br>characteristics | $n = 213$<br>Mean age =<br>20.5 years ( $\sigma$<br>4.6) | 80.8% female;<br>76.1% cohabiting;<br>Pre-COVID-19<br>PA - Pre-<br>contemplation<br>1.9%,<br>Contemplation<br>11.3%,<br>Preparation<br>23.9%, Action<br>41.3%,<br>Maintenance<br>21.6% | Perceived<br>health<br>status<br>including<br>anxiety and<br>depression<br><hr/> PA<br>Stages of<br>change in<br>PA<br><hr/> Sitting time | EQ-5D<br><hr/> IPAQ - SF<br>Transtheoretical<br>Model<br><hr/> IPAQ - SF                                                                          | ***                      |
| Rossinot<br>et al.<br>(2020)<br>[73]       | Behavioral<br>Changes<br>During<br>COVID-19<br>Confinement<br>in France: A<br>Web-Based<br>Study                                                           | France  | Cross-<br>sectional,<br>study via self-<br>administered<br>online survey | Stay-at-<br>home order   | French speaking,<br>living in France,<br>initially no age<br>restrictions then<br>limited to 24-65 years<br>old | To measure, characterise<br>and understand the<br>determinants of the<br>negative impact of<br>confinement on health-<br>related behaviours and<br>the mental state of the<br>French adult population                                                                                                                                                                                                            | $n = 1454$<br>Range 24–65<br>years                       | 63.5% female<br>69.3% increased<br>education<br>80% access to<br>outdoor space                                                                                                         | PA<br><hr/> Mental<br>Health<br><hr/> Other<br>outcomes                                                                                   | Part of<br>individually<br>constructed<br>questionnaire<br>(Unvalidated)<br><hr/> Individual<br>question<br><hr/> Individualised<br>questionnaire | **                       |

Table S1. Study characteristics continued.

| Authors/<br>Year         | Title                                                                                                                                                          | Country | Study Design                                               | COVID-19<br>Restrictions                    | Inclusion/Exclusion<br>Criteria                                         | Aim                                                                                                                                                                                                 | Participants                                                                                                                                    | Pertinent<br>Participant<br>Demographics                                 | Relevant<br>Outcomes                                                    | Outcome<br>Measurement<br>Tools                                                         | Overall<br>MMAT<br>Grade |
|--------------------------|----------------------------------------------------------------------------------------------------------------------------------------------------------------|---------|------------------------------------------------------------|---------------------------------------------|-------------------------------------------------------------------------|-----------------------------------------------------------------------------------------------------------------------------------------------------------------------------------------------------|-------------------------------------------------------------------------------------------------------------------------------------------------|--------------------------------------------------------------------------|-------------------------------------------------------------------------|-----------------------------------------------------------------------------------------|--------------------------|
| Silva et al. (2020) [74] | Physical Inactivity Is Associated with Increased Levels of Anxiety, Depression, and Stress in Brazilians During the COVID-19 Pandemic: A Cross-Sectional Study | Brazil  | Cross-sectional, study via self-administered online survey | Social distancing and stay-at-home order    | No details                                                              | To evaluate the levels of anxiety, depression, and stress associated with the practice of exercise during COVID-19 outbreak                                                                         | $n = 1154$<br>Mean age = 31.15 years ( $\sigma$ 9.68)<br>30.32% of the participants not practicing any type of exercise before social isolation | 69.84% female<br>34.83% married<br>At least 40.2% degree level of higher | Physical Exercise practice before and during pandemic<br><br>Depression | Individual question (Unvalidated)<br><br>Depression Anxiety Stress Scales 21 (DASS- 21) | **                       |
| Smith et al. (2020) [75] | Prevalence and correlates of physical activity in a sample of UK adults observing social distancing during the COVID-19 pandemic                               | UK      | Cross-sectional, study via self-administered online survey | Stay-at-home, once a day exercise permitted | Aged 18 years and over, residing in the UK, observing social distancing | To examine the levels of physical activity during the UK COVID-19 social distancing guidance and investigate how such levels vary by sociodemographic, behavioural, clinical and contextual factors | $n = 911$                                                                                                                                       | 64% female<br>50.4% aged 35–64 years only<br>18.3% over 65               | PA                                                                      | Individually constructed questionnaire (unvalidated)                                    | **                       |

**Table S1.** Study characteristics continued.

| Authors/<br>Year                    | Title                                                                                                                                          | Country | Study Design                                                             | COVID-19<br>Restrictions                                                                                            | Inclusion/Exclusion<br>Criteria          | Aim                                                                                                                                                                                                                                                                                                                                     | Participants                                                 | Pertinent<br>Participant<br>Demographics            | Relevant<br>Outcomes               | Outcome<br>Measurement<br>Tools                                                                     | Overall<br>MMAT<br>Grade |
|-------------------------------------|------------------------------------------------------------------------------------------------------------------------------------------------|---------|--------------------------------------------------------------------------|---------------------------------------------------------------------------------------------------------------------|------------------------------------------|-----------------------------------------------------------------------------------------------------------------------------------------------------------------------------------------------------------------------------------------------------------------------------------------------------------------------------------------|--------------------------------------------------------------|-----------------------------------------------------|------------------------------------|-----------------------------------------------------------------------------------------------------|--------------------------|
| Spence et<br>al. (2020)<br>[76]     | Determinants of<br>physical activity<br>among adults in<br>the United<br>Kingdom during<br>the COVID-19<br>pandemic: The<br>DUK-COVID<br>study | UK      | Cross-<br>sectional,<br>study via self-<br>administered<br>online survey | Stay-at-home,<br>once a day<br>exercise<br>permitted                                                                | Aged 18 years or<br>older, UK resident   | To survey current PA,<br>changes in PA<br>modalities (i.e., overall,<br>around the home, for<br>transport, in the<br>workplace, in the local<br>neighbourhood, at<br>recreation/sport<br>facilities) related to the<br>lockdown, and potential<br>motivational<br>determinants of such<br>behaviour among adults<br>residing in the UK. | $n = 1521$                                                   | 86% white<br>51% female<br>68.7% 30–64<br>years old | PA                                 | Individually<br>constructed<br>questionnaire<br>(Validated)                                         | ***                      |
| Stephan<br>et al.<br>(2020)<br>[77] | Physical Activity<br>and Sedentary<br>Behavior During<br>COVID-19:<br>Trajectory and<br>Moderation by<br>Personality                           | USA     | Cross-<br>sectional,<br>study via self-<br>administered<br>online survey | Varied<br>between states<br>- included<br>stay at home<br>orders, social<br>distancing,<br>closure of<br>facilities | No details                               | To examine the change<br>in both PA and<br>sedentary behaviour<br>during the COVID-19<br>pandemic and whether<br>personality is associated<br>with these changes                                                                                                                                                                        | $n = 6136$<br>Mean age =<br>48.62 years<br>( $\sigma$ 16.08) | 58% female<br>78% white                             | COM-B<br>beliefs                   | 6-item scale<br>adapted from<br>Keyworth,<br>Epton,<br>Goldthorpe,<br>Calam, and<br>Armitage (2020) | *                        |
|                                     |                                                                                                                                                |         |                                                                          |                                                                                                                     |                                          |                                                                                                                                                                                                                                                                                                                                         |                                                              |                                                     | PA                                 | Individual<br>question<br>(Unvalidated)                                                             |                          |
|                                     |                                                                                                                                                |         |                                                                          |                                                                                                                     | Aged 18 years or<br>older, living in USA |                                                                                                                                                                                                                                                                                                                                         | $n = 2230$<br>Mean age =<br>43.75<br>( $\sigma$ 18.64)       | 54% female<br>62% white                             | Personality<br><br>Sitting<br>time | Big Five<br>Inventory-2<br><br>Individual<br>question<br>(Unvalidated)                              |                          |

Table S1. Study characteristics continued.

| Authors/<br>Year                | Title                                                                                                                                                                                                                                             | Country | Study Design                                                                                     | COVID-19<br>Restrictions | Inclusion/Exclusion<br>Criteria | Aim                                                                                                                                                                                                                                                                                                                                           | Participants                                            | Pertinent<br>Participant<br>Demographics                                       | Relevant<br>Outcomes         | Outcome<br>Measurement<br>Tools                                                                              | Overall<br>MMAT<br>Grade |
|---------------------------------|---------------------------------------------------------------------------------------------------------------------------------------------------------------------------------------------------------------------------------------------------|---------|--------------------------------------------------------------------------------------------------|--------------------------|---------------------------------|-----------------------------------------------------------------------------------------------------------------------------------------------------------------------------------------------------------------------------------------------------------------------------------------------------------------------------------------------|---------------------------------------------------------|--------------------------------------------------------------------------------|------------------------------|--------------------------------------------------------------------------------------------------------------|--------------------------|
| Suzuki et<br>al. (2020)<br>[78] | Physical Activity<br>Changes and Its<br>Risk Factors<br>among<br>Community-<br>Dwelling<br>Japanese Older<br>Adults during<br>the COVID-19<br>Epidemic:<br>Associations<br>with Subjective<br>Well-Being and<br>Health-Related<br>Quality of Life | Japan   | Cross-sectional<br>study via 2<br>types of mailed<br>out self-<br>administered<br>questionnaires | Stay-at-<br>home order   | Aged 65 years old<br>or over    | To understand the<br>impact of public<br>health restrictions on<br>community-<br>dwelling older<br>adults since the<br>onset of COVID-19,<br>in relation to the<br>changes in PA,<br>subjective well-<br>being and HRQoL.<br>To investigate the<br>personal, social, and<br>physical<br>environmental<br>factors linked to a<br>decline in PA | $n = 165$<br>Mean age =<br>78.6 years<br>( $\sigma 8$ ) | 69.7% female<br>(Large<br>demographic<br>profile<br>presented in the<br>paper) | PA                           | Physical<br>Activity<br>Questionnaire<br>for Elderly<br>Japanese (PAQ-<br>EJ) plus<br>additional<br>question | ****                     |
|                                 |                                                                                                                                                                                                                                                   |         |                                                                                                  |                          |                                 |                                                                                                                                                                                                                                                                                                                                               |                                                         |                                                                                | Functional<br>Health         | Tokyo<br>Metropolitan<br>Institute of<br>Gerontology<br>Index of<br>Competence                               |                          |
|                                 |                                                                                                                                                                                                                                                   |         |                                                                                                  |                          |                                 |                                                                                                                                                                                                                                                                                                                                               |                                                         |                                                                                | Neighbourhood<br>environment | International<br>Physical<br>Activity<br>Questionnaire<br>Environment                                        |                          |
|                                 |                                                                                                                                                                                                                                                   |         |                                                                                                  |                          |                                 |                                                                                                                                                                                                                                                                                                                                               |                                                         |                                                                                | Subjective Well-<br>Being    | WHO-5 well-<br>being                                                                                         |                          |
|                                 |                                                                                                                                                                                                                                                   |         |                                                                                                  |                          |                                 |                                                                                                                                                                                                                                                                                                                                               |                                                         |                                                                                | HRQoL                        | Medical<br>Outcome Study                                                                                     |                          |

Table S1. Study characteristics continued.

| Authors/<br>Year                   | Title                                                                  | Country | Study Design                                                             | COVID-19<br>Restrictions                                                                                            | Inclusion/Exclusion<br>Criteria                                     | Aim                                                                                                                                                                                                                           | Participants                        | Pertinent<br>Participant<br>Demographics                                                                                                                               | Relevant<br>Outcomes           | Outcome<br>Measurement<br>Tools                               | Overall<br>MMAT<br>Grade |
|------------------------------------|------------------------------------------------------------------------|---------|--------------------------------------------------------------------------|---------------------------------------------------------------------------------------------------------------------|---------------------------------------------------------------------|-------------------------------------------------------------------------------------------------------------------------------------------------------------------------------------------------------------------------------|-------------------------------------|------------------------------------------------------------------------------------------------------------------------------------------------------------------------|--------------------------------|---------------------------------------------------------------|--------------------------|
| Weaver<br>et al.<br>(2021)<br>[79] | Health<br>Behaviours<br>at the Onset<br>of the<br>COVID-19<br>Pandemic | USA     | Cross-<br>sectional,<br>study via self-<br>administered<br>online survey | Varied<br>between states<br>- included stay<br>at home<br>orders, social<br>distancing,<br>closure of<br>facilities | Aged 18 years or<br>over, English<br>speaking, living in<br>the USA | To assess perceived<br>changes to health<br>behaviours before<br>and during COVID-<br>19 restrictions and<br>identify modifiable<br>and non-modifiable<br>risk/protective<br>factors associated<br>with health<br>behaviours. | $n = 362$<br>Range 18–<br>60+ years | 51.1% married;<br>68.8% white;<br>81.8% no<br>children 62.8%<br>degree educated<br>or higher<br>Mean PA = 2205<br>( $\sigma$ 3342.7) met<br>mins/week pre-<br>COVID-19 | PA                             | IPAQ-SF                                                       | ***                      |
|                                    |                                                                        |         |                                                                          |                                                                                                                     |                                                                     |                                                                                                                                                                                                                               |                                     |                                                                                                                                                                        | Sitting time                   |                                                               |                          |
|                                    |                                                                        |         |                                                                          |                                                                                                                     |                                                                     |                                                                                                                                                                                                                               |                                     |                                                                                                                                                                        | Diet<br>quality                | Dietary Screening<br>Questionnaire                            |                          |
|                                    |                                                                        |         |                                                                          |                                                                                                                     |                                                                     |                                                                                                                                                                                                                               |                                     |                                                                                                                                                                        | Social<br>Isolation            | Individual<br>question                                        |                          |
|                                    |                                                                        |         |                                                                          |                                                                                                                     |                                                                     |                                                                                                                                                                                                                               |                                     |                                                                                                                                                                        | Self-rated<br>health           | Valid single item                                             |                          |
|                                    |                                                                        |         |                                                                          |                                                                                                                     |                                                                     |                                                                                                                                                                                                                               |                                     |                                                                                                                                                                        | Resilience                     | Valid scale                                                   |                          |
|                                    |                                                                        |         |                                                                          |                                                                                                                     |                                                                     |                                                                                                                                                                                                                               |                                     |                                                                                                                                                                        | Depression                     | Center for<br>Epidemiological<br>Studies Depression<br>Scales |                          |
|                                    |                                                                        |         |                                                                          |                                                                                                                     |                                                                     |                                                                                                                                                                                                                               |                                     |                                                                                                                                                                        | Perceived<br>social<br>support | Multidimensional<br>Scale of Perceived<br>Social Support      |                          |
|                                    |                                                                        |         |                                                                          |                                                                                                                     |                                                                     |                                                                                                                                                                                                                               |                                     |                                                                                                                                                                        | Subjective<br>Well-Being       | Valid single item                                             |                          |

Table S1. Study characteristics continued.

| Authors/<br>Year                    | Title                                                                                                                                                                                              | Country            | Study Design                                                             | COVID-19<br>Restrictions                                                                                               | Inclusion/Exclusion<br>Criteria                                                                                          | Aim                                                                                                                                                                                                                                               | Participants                                                   | Pertinent<br>Participant<br>Demographics                                                                                                                                                    | Relevant<br>Outcomes                                         | Outcome<br>Measurement<br>Tools                               | Overall<br>MMAT<br>Grade |
|-------------------------------------|----------------------------------------------------------------------------------------------------------------------------------------------------------------------------------------------------|--------------------|--------------------------------------------------------------------------|------------------------------------------------------------------------------------------------------------------------|--------------------------------------------------------------------------------------------------------------------------|---------------------------------------------------------------------------------------------------------------------------------------------------------------------------------------------------------------------------------------------------|----------------------------------------------------------------|---------------------------------------------------------------------------------------------------------------------------------------------------------------------------------------------|--------------------------------------------------------------|---------------------------------------------------------------|--------------------------|
| Werneck<br>et al.<br>(2020)<br>[80] | The mediation<br>role of sleep<br>quality in the<br>association<br>between the<br>incidence of<br>unhealthy<br>movement<br>behaviours<br>during the<br>COVID-19<br>quarantine and<br>mental health | Brazil             | Cross-<br>sectional,<br>study via self-<br>administered<br>online survey | Social<br>distancing<br>and stay at<br>home order                                                                      | General population,<br>aged 18 years or over                                                                             | To investigate the<br>mediating role of<br>worsening sleep<br>quality in association<br>with incidence of<br>physical inactivity,<br>high TV-viewing and<br>high computer/tablet<br>use with loneliness,<br>sadness and anxiety                   | <i>n</i> = 45,161<br>(no<br>summary<br>stats)                  | <i>n</i> = 16,059 for PA<br>incidence, 40,903<br>for tv viewing<br>and 20,752 for<br>computer/tablet<br>use                                                                                 | PA<br>Screen<br>time<br>Sleep<br>Quality<br>Mental<br>Health | Individually<br>constructed<br>questionnaire<br>(Unvalidated) | ****                     |
| Yang et<br>al. (2020)<br>[81]       | Determinants of<br>physical activity<br>maintenance<br>during the Covid-<br>19 pandemic: a<br>focus on fitness<br>apps                                                                             | USA (45<br>states) | Cross-<br>sectional<br>study via self-<br>administered<br>online survey  | Varied<br>between<br>states -<br>included stay<br>at home<br>orders, social<br>distancing,<br>closure of<br>facilities | Healthy adults, aged<br>18–65 years, English<br>speaking, own a<br>smartphone, have<br>downloaded at least<br>one PA app | To consider<br>gamification-related<br>features besides<br>motivational and<br>educational features<br>of PA apps as factors<br>to describe three<br>relevant clusters of<br>app features that<br>might help predict<br>the maintenance of<br>PA. | <i>n</i> = 431<br>Mean age =<br>39.1 years<br>( $\sigma$ 10.6) | 49% female;<br>68.7% degree<br>educated or<br>higher<br>82.1 % Caucasian<br>84% employed<br>75% aged 21–45<br>years<br>Mean PA = 3323<br>met mins/week<br>( $\sigma$ 2451) pre-<br>COVID-19 | PA<br>Sedentary<br>time<br>PA app<br>use                     | IPAQ - SF<br>Individual<br>questions                          | ***                      |

COVID-19 = novel coronavirus disease 2019; EQ-5D = EuroQol-5 dimension; GAD-7 = general anxiety disorder-7; HADS = hospital anxiety and depression scale; HRQoL = health-related quality of life; IPAQ = International Physical Activity Questionnaire; QoL = quality of life; MET = metabolic equivalent; mins = minutes; MMAT = mixed methods assessment tool; MVPA = moderate-to-vigorous physical activity; n = number; PA = physical activity; PROMIS = patient-reported outcomes measurement information system; RA = rheumatoid arthritis; SB = sedentary behaviour; SD = standard deviation; SES = socioeconomic status; SF = short form; UK = United Kingdom; USA = United States of America; WHO = World Health Organization.

**Table S2.** Coding criteria for the Mixed Methods Assessment Tool.

| <b>Code Breakdown</b>                              |                                                                                                                         |
|----------------------------------------------------|-------------------------------------------------------------------------------------------------------------------------|
| Screening questions<br>(for all types)             | S1. Are there clear research questions?                                                                                 |
|                                                    | S2. Do the collected data allow to address the research questions?                                                      |
| 1. Qualitative                                     | 1.1. Is the qualitative approach appropriate to answer the research question?                                           |
|                                                    | 1.2. Are the qualitative data collection methods adequate to address the research question?                             |
|                                                    | 1.3. Are the findings adequately derived from the data?                                                                 |
|                                                    | 1.4. Is the interpretation of results sufficiently substantiated by data?                                               |
|                                                    | 1.5. Is there coherence between qualitative data sources, collection, analysis and interpretation?                      |
| 2. Quantitative<br>randomized controlled<br>trials | 2.1. Is randomization appropriately performed?                                                                          |
|                                                    | 2.2. Are the groups comparable at baseline?                                                                             |
|                                                    | 2.3. Are there complete outcome data?                                                                                   |
|                                                    | 2.4. Are outcome assessors blinded to the intervention provided?                                                        |
|                                                    | 2.5. Did the participants adhere to the assigned intervention?                                                          |
| 3. Quantitative<br>non-randomized                  | 3.1. Are the participants representative of the target population?                                                      |
|                                                    | 3.2. Are measurements appropriate regarding both the outcome and intervention (or exposure)?                            |
|                                                    | 3.3. Are there complete outcome data?                                                                                   |
|                                                    | 3.4. Are the confounders accounted for in the design and analysis?                                                      |
|                                                    | 3.5. During the study period, is the intervention administered (or exposure occurred) as intended?                      |
| 4. Quantitative<br>descriptive                     | 4.1. Is the sampling strategy relevant to address the research question?                                                |
|                                                    | 4.2. Is the sample representative of the target population?                                                             |
|                                                    | 4.3. Are the measurements appropriate?                                                                                  |
|                                                    | 4.4. Is the risk of nonresponse bias low?                                                                               |
|                                                    | 4.5. Is the statistical analysis appropriate to answer the research question?                                           |
| 5. Mixed methods                                   | 5.1. Is there an adequate rationale for using a mixed methods design to address the research question?                  |
|                                                    | 5.2. Are the different components of the study effectively integrated to answer the research question?                  |
|                                                    | 5.3. Are the outputs of the integration of qualitative and quantitative components adequately interpreted?              |
|                                                    | 5.4. Are divergences and inconsistencies between quantitative and qualitative results adequately addressed?             |
|                                                    | 5.5. Do the different components of the study adhere to the quality criteria of each tradition of the methods involved? |



**Table S3.** Quality assesement results from Mixed Methods Assessment Tool.

| Authors / Year<br>(Location)            | 1. Qualitative<br>Studies |      |      |      |      | 2. Randomized<br>Controlled Trials |      |      |      |      | 3. Non-Randomized<br>Studies |      |      |      |      | 4. Quantitative<br>Descriptive Studies |      |      |      |      | 5. Mixed Methods<br>Studies |      |      |      |      | Overall<br>Score | Comments                                                                                                |
|-----------------------------------------|---------------------------|------|------|------|------|------------------------------------|------|------|------|------|------------------------------|------|------|------|------|----------------------------------------|------|------|------|------|-----------------------------|------|------|------|------|------------------|---------------------------------------------------------------------------------------------------------|
|                                         | 1.1.                      | 1.2. | 1.3. | 1.4. | 1.5. | 2.1.                               | 2.2. | 2.3. | 2.4. | 2.5. | 3.1.                         | 3.2. | 3.3. | 3.4. | 3.5. | 4.1.                                   | 4.2. | 4.3. | 4.4. | 4.5. | 5.1.                        | 5.2. | 5.3. | 5.4. | 5.5. |                  |                                                                                                         |
| Acs et al. (2020)<br>[18]               |                           |      |      |      |      |                                    |      |      |      |      |                              |      |      |      |      | Y                                      | Y    | Y    | U    | Y    |                             |      |      |      |      | 4                | No other identifiable issues                                                                            |
| Alomari et al.<br>(2020) [19]           |                           |      |      |      |      |                                    |      |      |      |      |                              |      |      |      |      | Y                                      | Y    | N    | U    | Y    |                             |      |      |      |      | 3                | 4.3 unvalidated outcome measurement.                                                                    |
| Angosto et al.<br>(2020) [20]           |                           |      |      |      |      |                                    |      |      |      |      |                              |      |      |      |      | Y                                      | Y    | Y    | U    | Y    |                             |      |      |      |      | 4                | Non-prob sampling but specifically targeting amateurs                                                   |
| Asiamah et al.<br>(2020) [21]           |                           |      |      |      |      |                                    |      |      |      |      |                              |      |      |      |      | Y                                      | N    | Y    | U    | Y    |                             |      |      |      |      | 3                | 4.2 Sampling method bias highly educated sample not representative of targeted population, low mean age |
| Barwais (2020)<br>[22]                  |                           |      |      |      |      |                                    |      |      |      |      |                              |      |      |      |      | Y                                      | N    | Y    | U    | Y    |                             |      |      |      |      | 3                | 4.2 Target population not clearly defined, if it is general population then mean age is low             |
| Belgen et al.<br>(2020) [23]            |                           |      |      |      |      |                                    |      |      |      |      |                              |      |      |      |      | Y                                      | Y    | Y    | U    | Y    |                             |      |      |      |      | 4                | ? Should be paired t-tests not independent as only 1 group                                              |
| Brady et al.<br>(2020) [24]             |                           |      |      |      |      |                                    |      |      |      |      |                              |      |      |      |      | Y                                      | N    | Y    | U    | Y    |                             |      |      |      |      | 3                | 4.2 93% of sample female                                                                                |
| Canello et al.<br>(2020) [25]           |                           |      |      |      |      |                                    |      |      |      |      |                              |      |      |      |      | Y                                      | Y    | N    | U    | Y    |                             |      |      |      |      | 3                | 4.3 No validation of PA measurement                                                                     |
| Carriedo et al.<br>(2020a) [26]         |                           |      |      |      |      |                                    |      |      |      |      |                              |      |      |      |      | Y                                      | Y    | Y    | U    | Y    |                             |      |      |      |      | 4                | No other identifiable issues                                                                            |
| Carriedo et al.<br>(2020b) [27]         |                           |      |      |      |      |                                    |      |      |      |      |                              |      |      |      |      | Y                                      | U    | Y    | U    | Y    |                             |      |      |      |      | 3                | 4.2 Minimal participant details and no inclusion/exclusion criteria provided                            |
| Castaneda-Babarro et al.<br>(2020) [28] |                           |      |      |      |      |                                    |      |      |      |      |                              |      |      |      |      | Y                                      | Y    | Y    | U    | Y    |                             |      |      |      |      | 4                | No other identifiable issues                                                                            |
| Cecchini et al.<br>(2021) [29]          |                           |      |      |      |      |                                    |      |      |      |      |                              |      |      |      |      | Y                                      | N    | Y    | U    | Y    |                             |      |      |      |      | 3                | 4.2 Based on their comments on page 3, stating that the sample may not be representative                |
| Chang et al.<br>(2020) [30]             |                           |      |      |      |      |                                    |      |      |      |      |                              |      |      |      |      | Y                                      | Y    | N    | U    | Y    |                             |      |      |      |      | 3                | 4.3 No validation of PA assessment tool. Categorical data                                               |
| Chirico et al.<br>(2020) [31]           |                           |      |      |      |      |                                    |      |      |      |      |                              |      |      |      |      | Y                                      | N    | N    | U    | Y    |                             |      |      |      |      | 2                | 4.2 Low mean sample age, not representative of the population. 4.3 Unvalidated measure of PA            |

|                                 |   |   |   |   |   |   |  |   |                                                                                                                        |
|---------------------------------|---|---|---|---|---|---|--|---|------------------------------------------------------------------------------------------------------------------------|
| Colley et al.<br>(2020) [32]    |   | Y | U | Y | U | Y |  | 3 | 4.2 No participant demographics                                                                                        |
| Constandt et al.<br>(2020) [33] |   | Y | Y | U | U | Y |  | 3 | 4.3 ?No validation of outcome measurements                                                                             |
| Coughenour et al. (2020) [34]   |   | Y | Y | Y | N | Y |  | 4 | 4.4 Risk of Nonresponse bias as predominantly high achieving respondents                                               |
| Dunca et al.<br>(2020) [35]     |   | Y | Y | N | U | Y |  | 3 | 4.3 Unvalidated measure of PA                                                                                          |
| Fallon et al.<br>(2020) [36]    | Y | Y | Y | Y | Y |   |  | 5 | 3.3 yes for data we are looking at 3.4 see section 3.3 of paper                                                        |
| Fearnbach et al.<br>(2021) [37] |   | Y | N | Y | U | Y |  | 3 | 4.2 80% female                                                                                                         |
| Gallè et al.<br>(2020) [38]     |   | Y | Y | Y | U | Y |  | 4 | No other identifiable issues                                                                                           |
| Gildner et al.<br>(2021) [39]   |   | Y | Y | N | U | Y |  | 3 | 4.3 Unvalidated measure of PA                                                                                          |
| Ingram et al.<br>(2020) [40]    |   | Y | N | N | U | Y |  | 3 | 4.2 mean age low but ? No is too harsh 4.3 unvalidated method of PA measurement but appropriate for what is measuring? |
| Jacob et al.<br>(2020) [41]     |   | Y | Y | N | U | Y |  | 3 | 4.3 unvalidated method of PA measurement but appropriate for what is measuring?                                        |
| Karuc et al.<br>(2020) [42]     |   | Y | Y | Y | N | Y |  | 4 | 4.4 Response bias analysis pg 3 Stats appropriate for question but ? Why median not mean data                          |
| Katewongsa et al. (2020) [43]   |   | Y | N | Y | U | Y |  | 3 | 4.2 Sample is bias towards younger participants                                                                        |
| Kaur et al.<br>(2020) [44]      | Y | Y | Y | Y | Y |   |  | 5 | No identifiable issues                                                                                                 |
| Kaushal et al.<br>(2020) [45]   |   | Y | Y | Y | U | Y |  | 4 | No other identifiable issues                                                                                           |
| Khan et al.<br>(2020) [46]      |   | Y | Y | N | U | Y |  | 3 | 4.3 unvalidated measure of PA but not their primary outcome                                                            |
| Knell et al.<br>(2020) [47]     |   | Y | Y | Y | U | Y |  | 4 | No other identifiable issues                                                                                           |

|                                 |   |   |   |   |   |   |   |   |   |                                                                                                                                                                                |
|---------------------------------|---|---|---|---|---|---|---|---|---|--------------------------------------------------------------------------------------------------------------------------------------------------------------------------------|
| Lebel et al. (2020) [48]        |   |   |   | Y | Y | Y | U | Y | 4 | No other identifiable issues                                                                                                                                                   |
| Lesser et al. (2020) [49]       |   |   |   | Y | Y | Y | U | Y | 4 | No other identifiable issues                                                                                                                                                   |
| Limbers et al. (2020) [50]      |   |   |   | Y | N | Y | U | Y | 4 | 4.2 highly educated, predominantly white, married participants                                                                                                                 |
| Lin et al. (2020) [51]          |   |   |   | Y | Y | Y | U | Y | 4 | No other identifiable issues                                                                                                                                                   |
| Lopez-Bueno et al. (2020a) [52] |   |   |   | Y | Y | Y | U | Y | 4 | No other identifiable issues                                                                                                                                                   |
| Lopez-Bueno et al. (2020b) [53] |   |   |   | Y | Y | Y | U | Y | 4 | No other identifiable issues                                                                                                                                                   |
| Luciano et al. (2020) [54]      |   |   |   | Y | Y | Y | U | Y | 4 | Sample is difficult to assess as there are 2 different samples                                                                                                                 |
| Maher et al. (2021) [55]        |   |   |   | N | N | Y | U | Y | 2 | 4.1 & 4.2 Sampling strategy is limited to one specific class and therefore not representative                                                                                  |
| Martinez et al. (2020) [56]     |   |   |   | Y | N | N | U | Y | 2 | 4.3 unvalidated measure of PA 4.2 low population mean, sample not representative                                                                                               |
| Maugeri et al. (2020) [57]      |   |   |   | U | U | Y | U | Y | 2 | 4.1 & 4.2 No inclusion/exclusion criteria stated therefore unclear who the target population is                                                                                |
| McDowell et al. (2020) [58]     |   |   |   | Y | N | Y | U | Y | 3 | 4.2 sample predominantly Caucasian, educated, married                                                                                                                          |
| Meyer et al. (2020) [59]        |   |   |   | Y | N | U | U | Y | 2 | 4.2 sample predominantly Caucasian, educated, married 4.3 Minimum info on measurements                                                                                         |
| Munekawa et al. (2020) [60]     |   |   |   | Y | N | N | N | Y | 2 | 4.2 Small selective sample 4.3 unvalidated measure of PA 4.4 limited to those who chose to attend clinic during a pandemic, high chance those who did not attend more stressed |
| Nienhuis et al. (2020) [61]     |   |   |   | Y | N | Y | U | Y | 3 | 4.2 aim to look at differences between sexes but sample predominantly female                                                                                                   |
| Oliva et al. (2020) [62]        | Y | Y | Y | Y | Y |   |   |   | 5 | Study mixed method but only qualitative component relevant for this review therefore mixed methods criteria not assessed. Although support for the 1                           |

|  |  |  |  |  |  |  |  |  |  |  |  |  |  |  |  |  |  |  |  |  |  |  |  |  |  |  |  |  |  |  |  |  |  |  |  |  |  |  |  |  |  |  |  |  |  |  |  |  |  |  |  |  |  |  |  |  |  |  |  |  |  |  |  |  |  |  |  |  |  |  |  |  |  |  |  |  |  |  |  |  |  |  |  |  |  |  |  |  |  |  |  |  |  |  |  |  |  |  |  |  |  |  |  |  |  |  |  |  |  |  |  |  |  |  |  |  |  |  |  |  |  |  |  |  |  |  |  |  |  |  |  |  |  |  |  |  |  |  |  |  |  |  |  |  |  |  |  |  |  |  |  |  |  |  |  |  |  |  |  |  |  |  |  |  |  |  |  |  |  |  |  |  |  |  |  |  |  |  |  |  |  |  |  |  |  |  |  |  |  |  |  |  |  |  |  |  |  |  |  |  |  |  |  |  |  |  |  |  |  |  |  |  |  |  |  |  |  |  |  |  |  |  |  |  |  |  |  |  |  |  |  |  |  |  |  |  |  |  |  |  |  |  |  |  |  |  |  |  |  |  |  |  |  |  |  |  |  |  |  |  |  |  |  |  |  |  |  |  |  |  |  |  |  |  |  |  |  |  |  |  |  |  |  |  |  |  |  |  |  |  |  |  |  |  |  |  |  |  |  |  |  |  |  |  |  |  |  |  |  |  |  |  |  |  |  |  |  |  |  |  |  |  |  |  |  |  |  |  |  |  |  |  |  |  |  |  |  |  |  |  |  |  |  |  |  |  |  |  |  |  |  |  |  |  |  |  |  |  |  |  |  |  |  |  |  |  |  |  |  |  |  |  |  |  |  |  |  |  |  |  |  |  |  |  |  |  |  |  |  |  |  |  |  |  |  |  |  |  |  |  |  |  |  |  |  |  |  |  |  |  |  |  |  |  |  |  |  |  |  |  |  |  |  |  |  |  |  |  |  |  |  |  |  |  |  |  |  |  |  |  |  |  |  |  |  |  |  |  |  |  |  |  |  |  |  |  |  |  |  |  |  |  |  |  |  |  |  |  |  |  |  |  |  |  |  |  |  |  |  |  |  |  |  |  |  |  |  |  |  |  |  |  |  |  |  |  |  |  |  |  |  |  |  |  |  |  |  |  |  |  |  |  |  |  |  |  |  |  |  |  |  |  |  |  |  |  |  |  |  |  |  |  |  |  |  |  |  |  |  |  |  |  |  |  |  |  |  |  |  |  |  |  |  |  |  |  |  |  |  |  |  |  |  |  |  |  |  |  |  |  |  |  |  |  |  |  |  |  |  |  |  |  |  |  |  |  |  |  |  |  |  |  |  |  |  |  |  |  |  |  |  |  |  |  |  |  |  |  |  |  |  |  |  |  |  |  |  |  |  |  |  |  |  |  |  |  |  |  |  |  |  |  |  |  |  |  |  |  |  |  |  |  |  |  |  |  |  |  |  |  |  |  |  |  |  |  |  |  |  |  |  |  |  |  |  |  |  |  |  |  |  |  |  |  |  |  |  |  |  |  |  |  |  |  |  |  |  |  |  |  |  |  |  |  |  |  |  |  |  |  |  |  |  |  |  |  |  |  |  |  |  |  |  |  |  |  |  |  |  |  |  |  |  |  |  |  |  |  |  |  |  |  |  |  |  |  |  |  |  |  |  |  |  |  |  |  |  |  |  |  |  |  |  |  |  |  |  |  |  |  |  |  |  |  |  |  |  |  |  |  |  |  |  |  |  |  |  |  |  |  |  |  |  |  |  |  |  |  |  |  |  |  |  |  |  |  |  |  |  |  |  |  |  |  |  |  |  |  |  |  |  |  |  |  |  |  |  |  |  |  |  |  |  |  |  |  |  |  |  |  |  |  |  |  |  |  |  |  |  |  |  |  |  |  |  |  |  |  |  |  |  |  |  |  |  |  |  |  |  |  |  |  |  |  |  |  |  |  |  |  |  |  |  |  |  |  |  |  |  |  |  |  |  |  |  |  |  |  |  |  |  |  |  |  |  |  |  |  |  |  |  |  |  |  |  |  |  |  |  |  |  |  |  |  |  |  |  |  |  |  |  |  |  |  |  |  |  |  |  |  |  |  |  |  |  |  |  |  |  |  |  |  |  |  |  |  |  |  |  |  |  |  |  |  |  |  |  |  |  |  |  |  |  |  |  |  |  |  |  |  |  |  |  |  |  |  |  |  |  |  |  |  |  |  |  |  |  |  |  |  |  |  |  |  |  |  |  |  |  |  |  |  |  |  |  |  |  |  |  |  |  |  |  |  |  |  |  |  |  |  |  |  |  |  |  |  |  |  |  |  |  |  |  |  |  |  |  |  |  |  |  |  |  |  |  |  |  |  |  |  |  |  |  |  |  |  |  |  |  |  |  |  |  |  |  |  |  |  |  |  |  |  |  |  |  |  |  |  |  |  |  |  |  |  |  |  |  |  |  |  |  |  |  |  |  |  |  |  |  |  |  |  |  |  |  |  |  |  |  |  |  |  |  |  |  |  |  |  |  |  |  |  |  |  |  |  |  |  |  |  |  |  |  |  |  |  |  |  |  |  |  |  |  |  |  |  |  |  |  |  |  |  |  |  |  |  |  |  |  |  |  |  |  |  |  |  |  |  |  |  |  |  |  |  |  |  |  |  |  |  |  |  |  |  |  |  |  |  |  |  |  |  |  |  |  |  |  |  |  |  |  |  |  |  |  |  |  |  |  |  |  |  |  |  |  |  |  |  |  |  |  |  |  |  |  |  |  |  |  |  |  |  |  |  |  |  |  |  |  |  |  |  |  |  |  |  |  |  |  |  |  |  |  |  |  |  |  |  |  |  |  |  |  |  |  |  |  |  |  |  |  |  |  |  |  |  |  |  |  |  |  |  |  |  |  |  |  |  |  |  |  |  |  |  |  |  |  |  |  |  |  |  |  |  |  |  |  |  |  |  |  |  |  |  |  |  |  |  |  |  |  |  |  |  |  |  |  |  |  |  |  |  |  |  |  |  |  |  |  |  |  |  |  |  |  |  |  |  |  |  |  |  |  |  |  |  |  |  |  |  |  |  |  |  |  |  |  |  |  |  |  |  |  |  |  |  |  |  |  |  |  |  |  |  |  |  |  |  |  |  |  |  |  |  |  |  |  |  |  |  |  |  |  |  |  |  |  |  |  |  |  |  |  |  |  |  |  |  |  |  |  |  |  |  |  |  |  |  |  |  |  |  |  |  |  |  |  |  |  |  |  |  |  |  |  |  |  |  |  |  |  |  |  |  |  |  |  |  |  |  |  |  |  |  |  |  |  |  |  |  |  |  |  |  |  |  |  |  |  |  |  |  |  |  |  |  |  |  |  |  |  |  |  |  |  |  |  |  |  |  |  |  |  |  |  |  |  |  |  |  |  |  |  |  |  |  |  |  |  |  |  |  |  |  |  |  |  |  |  |  |  |  |    |
|--|--|--|--|--|--|--|--|--|--|--|--|--|--|--|--|--|--|--|--|--|--|--|--|--|--|--|--|--|--|--|--|--|--|--|--|--|--|--|--|--|--|--|--|--|--|--|--|--|--|--|--|--|--|--|--|--|--|--|--|--|--|--|--|--|--|--|--|--|--|--|--|--|--|--|--|--|--|--|--|--|--|--|--|--|--|--|--|--|--|--|--|--|--|--|--|--|--|--|--|--|--|--|--|--|--|--|--|--|--|--|--|--|--|--|--|--|--|--|--|--|--|--|--|--|--|--|--|--|--|--|--|--|--|--|--|--|--|--|--|--|--|--|--|--|--|--|--|--|--|--|--|--|--|--|--|--|--|--|--|--|--|--|--|--|--|--|--|--|--|--|--|--|--|--|--|--|--|--|--|--|--|--|--|--|--|--|--|--|--|--|--|--|--|--|--|--|--|--|--|--|--|--|--|--|--|--|--|--|--|--|--|--|--|--|--|--|--|--|--|--|--|--|--|--|--|--|--|--|--|--|--|--|--|--|--|--|--|--|--|--|--|--|--|--|--|--|--|--|--|--|--|--|--|--|--|--|--|--|--|--|--|--|--|--|--|--|--|--|--|--|--|--|--|--|--|--|--|--|--|--|--|--|--|--|--|--|--|--|--|--|--|--|--|--|--|--|--|--|--|--|--|--|--|--|--|--|--|--|--|--|--|--|--|--|--|--|--|--|--|--|--|--|--|--|--|--|--|--|--|--|--|--|--|--|--|--|--|--|--|--|--|--|--|--|--|--|--|--|--|--|--|--|--|--|--|--|--|--|--|--|--|--|--|--|--|--|--|--|--|--|--|--|--|--|--|--|--|--|--|--|--|--|--|--|--|--|--|--|--|--|--|--|--|--|--|--|--|--|--|--|--|--|--|--|--|--|--|--|--|--|--|--|--|--|--|--|--|--|--|--|--|--|--|--|--|--|--|--|--|--|--|--|--|--|--|--|--|--|--|--|--|--|--|--|--|--|--|--|--|--|--|--|--|--|--|--|--|--|--|--|--|--|--|--|--|--|--|--|--|--|--|--|--|--|--|--|--|--|--|--|--|--|--|--|--|--|--|--|--|--|--|--|--|--|--|--|--|--|--|--|--|--|--|--|--|--|--|--|--|--|--|--|--|--|--|--|--|--|--|--|--|--|--|--|--|--|--|--|--|--|--|--|--|--|--|--|--|--|--|--|--|--|--|--|--|--|--|--|--|--|--|--|--|--|--|--|--|--|--|--|--|--|--|--|--|--|--|--|--|--|--|--|--|--|--|--|--|--|--|--|--|--|--|--|--|--|--|--|--|--|--|--|--|--|--|--|--|--|--|--|--|--|--|--|--|--|--|--|--|--|--|--|--|--|--|--|--|--|--|--|--|--|--|--|--|--|--|--|--|--|--|--|--|--|--|--|--|--|--|--|--|--|--|--|--|--|--|--|--|--|--|--|--|--|--|--|--|--|--|--|--|--|--|--|--|--|--|--|--|--|--|--|--|--|--|--|--|--|--|--|--|--|--|--|--|--|--|--|--|--|--|--|--|--|--|--|--|--|--|--|--|--|--|--|--|--|--|--|--|--|--|--|--|--|--|--|--|--|--|--|--|--|--|--|--|--|--|--|--|--|--|--|--|--|--|--|--|--|--|--|--|--|--|--|--|--|--|--|--|--|--|--|--|--|--|--|--|--|--|--|--|--|--|--|--|--|--|--|--|--|--|--|--|--|--|--|--|--|--|--|--|--|--|--|--|--|--|--|--|--|--|--|--|--|--|--|--|--|--|--|--|--|--|--|--|--|--|--|--|--|--|--|--|--|--|--|--|--|--|--|--|--|--|--|--|--|--|--|--|--|--|--|--|--|--|--|--|--|--|--|--|--|--|--|--|--|--|--|--|--|--|--|--|--|--|--|--|--|--|--|--|--|--|--|--|--|--|--|--|--|--|--|--|--|--|--|--|--|--|--|--|--|--|--|--|--|--|--|--|--|--|--|--|--|--|--|--|--|--|--|--|--|--|--|--|--|--|--|--|--|--|--|--|--|--|--|--|--|--|--|--|--|--|--|--|--|--|--|--|--|--|--|--|--|--|--|--|--|--|--|--|--|--|--|--|--|--|--|--|--|--|--|--|--|--|--|--|--|--|--|--|--|--|--|--|--|--|--|--|--|--|--|--|--|--|--|--|--|--|--|--|--|--|--|--|--|--|--|--|--|--|--|--|--|--|--|--|--|--|--|--|--|--|--|--|--|--|--|--|--|--|--|--|--|--|--|--|--|--|--|--|--|--|--|--|--|--|--|--|--|--|--|--|--|--|--|--|--|--|--|--|--|--|--|--|--|--|--|--|--|--|--|--|--|--|--|--|--|--|--|--|--|--|--|--|--|--|--|--|--|--|--|--|--|--|--|--|--|--|--|--|--|--|--|--|--|--|--|--|--|--|--|--|--|--|--|--|--|--|--|--|--|--|--|--|--|--|--|--|--|--|--|--|--|--|--|--|--|--|--|--|--|--|--|--|--|--|--|--|--|--|--|--|--|--|--|--|--|--|--|--|--|--|--|--|--|--|--|--|--|--|--|--|--|--|--|--|--|--|--|--|--|--|--|--|--|--|--|--|--|--|--|--|--|--|--|--|--|--|--|--|--|--|--|--|--|--|--|--|--|--|--|--|--|--|--|--|--|--|--|--|--|--|--|--|--|--|--|--|--|--|--|--|--|--|--|--|--|--|--|--|--|--|--|--|--|--|--|--|--|--|--|--|--|--|--|--|--|--|--|--|--|--|--|--|--|--|--|--|--|--|--|--|--|--|--|--|--|--|--|--|--|--|--|--|--|--|--|--|--|--|--|--|--|--|--|--|--|--|--|--|--|--|--|--|--|--|--|--|--|--|--|--|--|--|--|--|--|--|--|--|--|--|--|--|--|--|--|--|--|--|--|--|--|--|--|--|--|--|--|--|--|--|--|--|--|--|--|--|--|--|--|--|--|--|--|--|--|--|--|--|--|--|--|--|--|--|--|--|--|--|--|--|--|--|--|--|--|--|--|--|--|--|--|--|--|--|--|--|--|--|--|--|--|--|--|--|--|--|--|--|--|--|--|--|--|--|--|--|--|--|--|--|--|--|--|--|--|--|--|--|--|--|--|--|--|--|--|--|--|--|--|--|--|--|--|--|--|--|--|--|--|--|--|--|--|--|--|--|--|--|--|--|--|--|--|--|--|--|--|--|--|--|--|--|--|--|--|--|--|--|--|--|--|--|--|--|--|--|--|--|--|--|--|--|--|--|--|--|--|--|--|--|--|--|--|--|--|--|--|--|--|--|--|--|--|--|--|--|--|--|--|--|--|--|--|--|--|--|--|--|--|--|--|--|--|--|--|--|--|--|--|--|--|--|--|--|--|--|--|--|--|--|--|--|--|--|--|--|--|--|--|----|
|  |  |  |  |  |  |  |  |  |  |  |  |  |  |  |  |  |  |  |  |  |  |  |  |  |  |  |  |  |  |  |  |  |  |  |  |  |  |  |  |  |  |  |  |  |  |  |  |  |  |  |  |  |  |  |  |  |  |  |  |  |  |  |  |  |  |  |  |  |  |  |  |  |  |  |  |  |  |  |  |  |  |  |  |  |  |  |  |  |  |  |  |  |  |  |  |  |  |  |  |  |  |  |  |  |  |  |  |  |  |  |  |  |  |  |  |  |  |  |  |  |  |  |  |  |  |  |  |  |  |  |  |  |  |  |  |  |  |  |  |  |  |  |  |  |  |  |  |  |  |  |  |  |  |  |  |  |  |  |  |  |  |  |  |  |  |  |  |  |  |  |  |  |  |  |  |  |  |  |  |  |  |  |  |  |  |  |  |  |  |  |  |  |  |  |  |  |  |  |  |  |  |  |  |  |  |  |  |  |  |  |  |  |  |  |  |  |  |  |  |  |  |  |  |  |  |  |  |  |  |  |  |  |  |  |  |  |  |  |  |  |  |  |  |  |  |  |  |  |  |  |  |  |  |  |  |  |  |  |  |  |  |  |  |  |  |  |  |  |  |  |  |  |  |  |  |  |  |  |  |  |  |  |  |  |  |  |  |  |  |  |  |  |  |  |  |  |  |  |  |  |  |  |  |  |  |  |  |  |  |  |  |  |  |  |  |  |  |  |  |  |  |  |  |  |  |  |  |  |  |  |  |  |  |  |  |  |  |  |  |  |  |  |  |  |  |  |  |  |  |  |  |  |  |  |  |  |  |  |  |  |  |  |  |  |  |  |  |  |  |  |  |  |  |  |  |  |  |  |  |  |  |  |  |  |  |  |  |  |  |  |  |  |  |  |  |  |  |  |  |  |  |  |  |  |  |  |  |  |  |  |  |  |  |  |  |  |  |  |  |  |  |  |  |  |  |  |  |  |  |  |  |  |  |  |  |  |  |  |  |  |  |  |  |  |  |  |  |  |  |  |  |  |  |  |  |  |  |  |  |  |  |  |  |  |  |  |  |  |  |  |  |  |  |  |  |  |  |  |  |  |  |  |  |  |  |  |  |  |  |  |  |  |  |  |  |  |  |  |  |  |  |  |  |  |  |  |  |  |  |  |  |  |  |  |  |  |  |  |  |  |  |  |  |  |  |  |  |  |  |  |  |  |  |  |  |  |  |  |  |  |  |  |  |  |  |  |  |  |  |  |  |  |  |  |  |  |  |  |  |  |  |  |  |  |  |  |  |  |  |  |  |  |  |  |  |  |  |  |  |  |  |  |  |  |  |  |  |  |  |  |  |  |  |  |  |  |  |  |  |  |  |  |  |  |  |  |  |  |  |  |  |  |  |  |  |  |  |  |  |  |  |  |  |  |  |  |  |  |  |  |  |  |  |  |  |  |  |  |  |  |  |  |  |  |  |  |  |  |  |  |  |  |  |  |  |  |  |  |  |  |  |  |  |  |  |  |  |  |  |  |  |  |  |  |  |  |  |  |  |  |  |  |  |  |  |  |  |  |  |  |  |  |  |  |  |  |  |  |  |  |  |  |  |  |  |  |  |  |  |  |  |  |  |  |  |  |  |  |  |  |  |  |  |  |  |  |  |  |  |  |  |  |  |  |  |  |  |  |  |  |  |  |  |  |  |  |  |  |  |  |  |  |  |  |  |  |  |  |  |  |  |  |  |  |  |  |  |  |  |  |  |  |  |  |  |  |  |  |  |  |  |  |  |  |  |  |  |  |  |  |  |  |  |  |  |  |  |  |  |  |  |  |  |  |  |  |  |  |  |  |  |  |  |  |  |  |  |  |  |  |  |  |  |  |  |  |  |  |  |  |  |  |  |  |  |  |  |  |  |  |  |  |  |  |  |  |  |  |  |  |  |  |  |  |  |  |  |  |  |  |  |  |  |  |  |  |  |  |  |  |  |  |  |  |  |  |  |  |  |  |  |  |  |  |  |  |  |  |  |  |  |  |  |  |  |  |  |  |  |  |  |  |  |  |  |  |  |  |  |  |  |  |  |  |  |  |  |  |  |  |  |  |  |  |  |  |  |  |  |  |  |  |  |  |  |  |  |  |  |  |  |  |  |  |  |  |  |  |  |  |  |  |  |  |  |  |  |  |  |  |  |  |  |  |  |  |  |  |  |  |  |  |  |  |  |  |  |  |  |  |  |  |  |  |  |  |  |  |  |  |  |  |  |  |  |  |  |  |  |  |  |  |  |  |  |  |  |  |  |  |  |  |  |  |  |  |  |  |  |  |  |  |  |  |  |  |  |  |  |  |  |  |  |  |  |  |  |  |  |  |  |  |  |  |  |  |  |  |  |  |  |  |  |  |  |  |  |  |  |  |  |  |  |  |  |  |  |  |  |  |  |  |  |  |  |  |  |  |  |  |  |  |  |  |  |  |  |  |  |  |  |  |  |  |  |  |  |  |  |  |  |  |  |  |  |  |  |  |  |  |  |  |  |  |  |  |  |  |  |  |  |  |  |  |  |  |  |  |  |  |  |  |  |  |  |  |  |  |  |  |  |  |  |  |  |  |  |  |  |  |  |  |  |  |  |  |  |  |  |  |  |  |  |  |  |  |  |  |  |  |  |  |  |  |  |  |  |  |  |  |  |  |  |  |  |  |  |  |  |  |  |  |  |  |  |  |  |  |  |  |  |  |  |  |  |  |  |  |  |  |  |  |  |  |  |  |  |  |  |  |  |  |  |  |  |  |  |  |  |  |  |  |  |  |  |  |  |  |  |  |  |  |  |  |  |  |  |  |  |  |  |  |  |  |  |  |  |  |  |  |  |  |  |  |  |  |  |  |  |  |  |  |  |  |  |  |  |  |  |  |  |  |  |  |  |  |  |  |  |  |  |  |  |  |  |  |  |  |  |  |  |  |  |  |  |  |  |  |  |  |  |  |  |  |  |  |  |  |  |  |  |  |  |  |  |  |  |  |  |  |  |  |  |  |  |  |  |  |  |  |  |  |  |  |  |  |  |  |  |  |  |  |  |  |  |  |  |  |  |  |  |  |  |  |  |  |  |  |  |  |  |  |  |  |  |  |  |  |  |  |  |  |  |  |  |  |  |  |  |  |  |  |  |  |  |  |  |  |  |  |  |  |  |  |  |  |  |  |  |  |  |  |  |  |  |  |  |  |  |  |  |  |  |  |  |  |  |  |  |  |  |  |  |  |  |  |  |  |  |  |  |  |  |  |  |  |  |  |  |  |  |  |  |  |  |  |  |  |  |  |  |  |  |  |  |  |  |  |  |  |  |  |  |  |  |  |  |  |  |  |  |  |  |  |  |  |  |  |  |  |  |  |  |  |  |  |  |  |  |  |  |  |  |  |  |  |  |  |  |  |  |  |  |  |  |  |  |  |  |  |  |  |  |  |  |  |  |  |  |  |  |  | </ |
|--|--|--|--|--|--|--|--|--|--|--|--|--|--|--|--|--|--|--|--|--|--|--|--|--|--|--|--|--|--|--|--|--|--|--|--|--|--|--|--|--|--|--|--|--|--|--|--|--|--|--|--|--|--|--|--|--|--|--|--|--|--|--|--|--|--|--|--|--|--|--|--|--|--|--|--|--|--|--|--|--|--|--|--|--|--|--|--|--|--|--|--|--|--|--|--|--|--|--|--|--|--|--|--|--|--|--|--|--|--|--|--|--|--|--|--|--|--|--|--|--|--|--|--|--|--|--|--|--|--|--|--|--|--|--|--|--|--|--|--|--|--|--|--|--|--|--|--|--|--|--|--|--|--|--|--|--|--|--|--|--|--|--|--|--|--|--|--|--|--|--|--|--|--|--|--|--|--|--|--|--|--|--|--|--|--|--|--|--|--|--|--|--|--|--|--|--|--|--|--|--|--|--|--|--|--|--|--|--|--|--|--|--|--|--|--|--|--|--|--|--|--|--|--|--|--|--|--|--|--|--|--|--|--|--|--|--|--|--|--|--|--|--|--|--|--|--|--|--|--|--|--|--|--|--|--|--|--|--|--|--|--|--|--|--|--|--|--|--|--|--|--|--|--|--|--|--|--|--|--|--|--|--|--|--|--|--|--|--|--|--|--|--|--|--|--|--|--|--|--|--|--|--|--|--|--|--|--|--|--|--|--|--|--|--|--|--|--|--|--|--|--|--|--|--|--|--|--|--|--|--|--|--|--|--|--|--|--|--|--|--|--|--|--|--|--|--|--|--|--|--|--|--|--|--|--|--|--|--|--|--|--|--|--|--|--|--|--|--|--|--|--|--|--|--|--|--|--|--|--|--|--|--|--|--|--|--|--|--|--|--|--|--|--|--|--|--|--|--|--|--|--|--|--|--|--|--|--|--|--|--|--|--|--|--|--|--|--|--|--|--|--|--|--|--|--|--|--|--|--|--|--|--|--|--|--|--|--|--|--|--|--|--|--|--|--|--|--|--|--|--|--|--|--|--|--|--|--|--|--|--|--|--|--|--|--|--|--|--|--|--|--|--|--|--|--|--|--|--|--|--|--|--|--|--|--|--|--|--|--|--|--|--|--|--|--|--|--|--|--|--|--|--|--|--|--|--|--|--|--|--|--|--|--|--|--|--|--|--|--|--|--|--|--|--|--|--|--|--|--|--|--|--|--|--|--|--|--|--|--|--|--|--|--|--|--|--|--|--|--|--|--|--|--|--|--|--|--|--|--|--|--|--|--|--|--|--|--|--|--|--|--|--|--|--|--|--|--|--|--|--|--|--|--|--|--|--|--|--|--|--|--|--|--|--|--|--|--|--|--|--|--|--|--|--|--|--|--|--|--|--|--|--|--|--|--|--|--|--|--|--|--|--|--|--|--|--|--|--|--|--|--|--|--|--|--|--|--|--|--|--|--|--|--|--|--|--|--|--|--|--|--|--|--|--|--|--|--|--|--|--|--|--|--|--|--|--|--|--|--|--|--|--|--|--|--|--|--|--|--|--|--|--|--|--|--|--|--|--|--|--|--|--|--|--|--|--|--|--|--|--|--|--|--|--|--|--|--|--|--|--|--|--|--|--|--|--|--|--|--|--|--|--|--|--|--|--|--|--|--|--|--|--|--|--|--|--|--|--|--|--|--|--|--|--|--|--|--|--|--|--|--|--|--|--|--|--|--|--|--|--|--|--|--|--|--|--|--|--|--|--|--|--|--|--|--|--|--|--|--|--|--|--|--|--|--|--|--|--|--|--|--|--|--|--|--|--|--|--|--|--|--|--|--|--|--|--|--|--|--|--|--|--|--|--|--|--|--|--|--|--|--|--|--|--|--|--|--|--|--|--|--|--|--|--|--|--|--|--|--|--|--|--|--|--|--|--|--|--|--|--|--|--|--|--|--|--|--|--|--|--|--|--|--|--|--|--|--|--|--|--|--|--|--|--|--|--|--|--|--|--|--|--|--|--|--|--|--|--|--|--|--|--|--|--|--|--|--|--|--|--|--|--|--|--|--|--|--|--|--|--|--|--|--|--|--|--|--|--|--|--|--|--|--|--|--|--|--|--|--|--|--|--|--|--|--|--|--|--|--|--|--|--|--|--|--|--|--|--|--|--|--|--|--|--|--|--|--|--|--|--|--|--|--|--|--|--|--|--|--|--|--|--|--|--|--|--|--|--|--|--|--|--|--|--|--|--|--|--|--|--|--|--|--|--|--|--|--|--|--|--|--|--|--|--|--|--|--|--|--|--|--|--|--|--|--|--|--|--|--|--|--|--|--|--|--|--|--|--|--|--|--|--|--|--|--|--|--|--|--|--|--|--|--|--|--|--|--|--|--|--|--|--|--|--|--|--|--|--|--|--|--|--|--|--|--|--|--|--|--|--|--|--|--|--|--|--|--|--|--|--|--|--|--|--|--|--|--|--|--|--|--|--|--|--|--|--|--|--|--|--|--|--|--|--|--|--|--|--|--|--|--|--|--|--|--|--|--|--|--|--|--|--|--|--|--|--|--|--|--|--|--|--|--|--|--|--|--|--|--|--|--|--|--|--|--|--|--|--|--|--|--|--|--|--|--|--|--|--|--|--|--|--|--|--|--|--|--|--|--|--|--|--|--|--|--|--|--|--|--|--|--|--|--|--|--|--|--|--|--|--|--|--|--|--|--|--|--|--|--|--|--|--|--|--|--|--|--|--|--|--|--|--|--|--|--|--|--|--|--|--|--|--|--|--|--|--|--|--|--|--|--|--|--|--|--|--|--|--|--|--|--|--|--|--|--|--|--|--|--|--|--|--|--|--|--|--|--|--|--|--|--|--|--|--|--|--|--|--|--|--|--|--|--|--|--|--|--|--|--|--|--|--|--|--|--|--|--|--|--|--|--|--|--|--|--|--|--|--|--|--|--|--|--|--|--|--|--|--|--|--|--|--|--|--|--|--|--|--|--|--|--|--|--|--|--|--|--|--|--|--|--|--|--|--|--|--|--|--|--|--|--|--|--|--|--|--|--|--|--|--|--|--|--|--|--|--|--|--|--|--|--|--|--|--|--|--|--|--|--|--|--|--|--|--|--|--|--|--|--|--|--|--|--|--|--|--|--|--|--|--|--|--|--|--|--|--|--|--|--|--|--|--|--|--|--|--|--|--|--|--|--|--|--|--|--|--|--|--|--|--|--|--|--|--|--|--|--|--|--|--|--|--|--|--|--|--|--|--|--|--|--|--|--|--|--|--|--|--|--|--|--|--|--|--|--|--|--|--|--|--|--|--|--|--|--|--|--|--|--|--|--|--|--|--|--|--|--|--|--|--|--|--|--|--|--|--|--|--|--|--|--|--|--|--|--|--|--|--|--|--|--|--|--|--|--|--|--|--|--|--|--|--|--|--|--|--|--|--|--|--|--|--|--|--|--|--|--|--|--|--|--|--|----|

|                               |   |   |   |   |   |   |                                                                                                                                                                                |
|-------------------------------|---|---|---|---|---|---|--------------------------------------------------------------------------------------------------------------------------------------------------------------------------------|
| Smith et al.<br>(2020) [75]   | Y | N | N | U | Y | 2 | 4.2 sample bias towards younger participants 4.3 unvalidated measure of PA                                                                                                     |
| Spence et al.<br>(2020) [76]  | Y | N | Y | U | Y | 3 | 4.2 sample ethically bias                                                                                                                                                      |
| Stephan et al.<br>(2020) [77] | U | N | N | U | Y | 1 | 4.1 unclear who the target population is limited/no inclusion criteria. 4.2 sample biased to white, educated... 4.3 no validation of outcome measure of PA or SB. 4.4 unclear. |
| Suzuki et al.<br>(2020) [78]  | Y | Y | Y | N | Y | 4 | 4.4 of 400 targeted only 165 included                                                                                                                                          |
| Weaver et al.<br>(2021) [79]  | Y | N | Y | U | Y | 3 | 4.2 whilst sample stratified it is not ethnically diverse                                                                                                                      |
| Werneck et al.<br>(2020) [80] | Y | Y | N | Y | Y | 4 | 4.3 unvalidated questionnaire                                                                                                                                                  |
| Yang et al.<br>(2020) [81]    | Y | N | Y | N | Y | 3 | 4.2 87% Caucasian 4.4 49% attrition rate                                                                                                                                       |

Y = yes; N = no; U = unclear.
